## Language vs. ToM Networks in Naturalistic Stimulus Tracking

### 1 **Differential tracking of linguistic vs. mental state content in naturalistic stimuli by** 2 **language and Theory of Mind (ToM) brain networks**

3  
4 Alexander M. Paunov<sup>1,2</sup>, Idan A. Blank<sup>1,2,3</sup>, Olessia Jouravlev<sup>1,2,4</sup>, Zachary Mineroff<sup>1,2,5</sup>, Jeanne  
5 Gallée<sup>6</sup> & Evelina Fedorenko<sup>1,2,6</sup>

6  
7 <sup>1</sup> Department of Brain and Cognitive Sciences, MIT, Cambridge MA 02139

8 <sup>2</sup> McGovern Institute for Brain Research, MIT, Cambridge MA 02139

9 <sup>3</sup> Department of Psychology, UCLA, Los Angeles CA 90095

10 <sup>4</sup> Institute for Cognitive Science, Carleton University, Ottawa, Canada K1S 5B6

11 <sup>5</sup> Eberly Center for Teaching Excellence & Educational Innovation, CMU, Pittsburgh, PA, 15213

12 <sup>6</sup> Program in Speech and Hearing Bioscience and Technology, Harvard University, Boston, MA,  
13 02115

14  
15 Corresponding authors: Alex Paunov ([apaunov@mit.edu](mailto:apaunov@mit.edu); 43 Vassar Street, Room 3037,  
16 Cambridge, MA 02139) and Ev Fedorenko ([evelina9@mit.edu](mailto:evelina9@mit.edu); 43 Vassar Street, Room 3037,  
17 Cambridge, MA 02139).

### 18 **Acknowledgments**

19 We would like to acknowledge the Athinoula A. Martinos Imaging Center at the McGovern  
20 Institute for Brain Research at MIT, and its support team (Steve Shannon and Atsushi  
21 Takahashi). We thank former and current EvLab members (especially Brianna Pritchett and  
22 Caitlyn Hoeflin) for their help with data collection, Amaya Arcelus for help with creating the  
23 Heider & Simmel style animation, Caroline Arnold for help with recording the dialog condition,  
24 and Jessica Chen and Yotaro Sueoka for help with manuscript preparation. This research and EF  
25 were supported by R01 awards DC016607 and DC016950 from NIDCD, a grant from the  
26 Simons Foundation to the Simons Center for the Social Brain at MIT, and the Newton Brain  
27 Science Award from the Brain and Cognitive Sciences Department at MIT.  
28  
29

### 30 **Contributions**

31 AP, IB and EF developed the concept for the study. AP, IB and JG selected / created  
32 experimental materials. AP, IB, OJ and ZM collected and analyzed the data. AP performed the  
33 final version of the statistical analyses for the current study that are reported here. AP, IB, and  
34 EF wrote the manuscript with input from other co-authors.  
35

### 36 **Conflict of interest**

37 Authors report no conflict of interest.  
38  
39

## Language vs. ToM Networks in Naturalistic Stimulus Tracking

40 **Differential tracking of linguistic vs. mental state content in naturalistic stimuli by**  
41 **language and Theory of Mind (ToM) brain networks**

42

43 **Short title:** Language vs. ToM Networks in Naturalistic Stimulus Tracking

44

45 **Keywords:** language, theory of mind, social cognition, intersubject correlations, naturalistic  
46 fMRI

## Language vs. ToM Networks in Naturalistic Stimulus Tracking

47  
48  
49  
50  
51  
52  
53  
54  
55  
56  
57  
58  
59  
60  
61  
62  
63  
64  
65  
66  
67  
68  
69  
70

### Abstract

Language and social cognition, especially the ability to reason about mental states, known as Theory of Mind (ToM), are deeply related in development and everyday use. However, whether these cognitive faculties rely on distinct, overlapping, or the same mechanisms remains debated. Some evidence suggests that, by adulthood, language and ToM draw on largely distinct—though plausibly interacting—cortical networks. However, the broad topography of these networks is similar, and some have emphasized the importance of social content / communicative intent in the linguistic signal for eliciting responses in the language areas. Here, we combine the power of individual-subjects functional localization with the naturalistic-cognition inter-subject correlation approach to illuminate the language-ToM relationship. Using fMRI, we recorded neural activity as participants (n=43) listened to stories and dialogs with mental state content (+linguistic, +ToM), viewed silent animations and live action films with mental state content but no language (-linguistic, +ToM), or listened to an expository text (+linguistic, -ToM). The ToM network robustly tracked stimuli rich in mental state information regardless of whether mental states were conveyed linguistically or non-linguistically, while tracking a +linguistic/-ToM stimulus only weakly. In contrast, the language network tracked linguistic stimuli more strongly than a) non-linguistic stimuli, and than b) the ToM network, and showed reliable tracking even for the linguistic condition devoid of mental state content. These findings suggest that in spite of their indisputably close links, language and ToM dissociate robustly in their neural substrates, and thus plausibly cognitive mechanisms, including during the processing of rich naturalistic materials.

## Language vs. ToM Networks in Naturalistic Stimulus Tracking

71

### 72 **1. Introduction**

73

74 Language and social cognition, especially the ability to reason about mental states, known as  
75 Theory of Mind or ToM, are deeply related in human development, everyday use, and possibly  
76 evolution. After all, language use is a communicative behavior, which is a kind of cooperative  
77 behavior, and cooperative behaviors are, in turn, a kind of social behavior (e.g., Grice, 1968,  
78 1975, Sperber & Wilson, 1986). Construed this way, language can hardly be encapsulated from  
79 social cognition (cf. Fodor, 1983); it is subsumed *within* social cognition. Interpreting linguistic  
80 signals bears key parallels to the interpretation of other intentional behaviors (e.g., Grice, 1975;  
81 Sperber & Wilson, 1986). Communicative utterances, like other behaviors, are assumed to have  
82 goals, and conversation partners are assumed to pursue these goals rationally. Furthermore,  
83 everyday discourse appears to be dominated by information about other people (e.g., Dunbar,  
84 Marriott & Duncan, 1997), and the need to keep track of others' social record has been proposed  
85 as a key driver of language evolution (e.g., Dunbar, 2004; Nowak & Sigmund, 2005;  
86 Sommerfield, Krambeck & Milinski, 2008; Nowak & Highfield, 2011). Lastly, evidence of  
87 others' mental states conveyed through language is arguably richer and certainly more direct /  
88 less ambiguous than what can be inferred from non-linguistic intentional behavior alone: trying  
89 to infer the beliefs guiding someone's actions can be obviated by their telling you what those  
90 beliefs are.

91

92 Yet in the relatively brief history of cognitive neuroscience, the study of language and of social  
93 cognition have, for the most part, proceeded independently. The two cognitive domains have  
94 been treated, often implicitly, as components of a “nearly decomposable system” (Simon, 1962)

## Language vs. ToM Networks in Naturalistic Stimulus Tracking

95 – a system in which interactions between the component subsystems (language and social  
96 cognition here) are sufficiently less common than interactions among each subsystem’s parts to  
97 warrant a “divide and conquer” strategy (Saxe, Brett, & Kanwisher, 2006). On such a strategy,  
98 each subsystem can first be investigated on its own, leaving questions of potential dependencies  
99 between subsystems for a later stage. The application of this strategy to language and social  
100 cognition has been remarkably successful, and even this later stage is now coming within reach.  
101 But is near-decomposability a true property of the relationship between language and social  
102 cognition, or merely a simplifying assumption? It is difficult to say because most studies to date  
103 have deliberately aimed to isolate one or the other component subsystem rather than probe their  
104 relationship (cf. Deen et al., 2015; Paunov et al., 2019; Braga et al., 2020). So we know that  
105 language and social cognition *can* dissociate, under appropriate experimental conditions. But do  
106 they, in fact, dissociate in everyday, naturalistic cognition? This is the question we tackle in the  
107 current study.

108

109 Before we proceed to describe the current study, we review what is currently known about the  
110 neural bases of linguistic processing and of Theory of Mind.

111

112 *Language network.* Language processing engages a network of left-lateralized brain regions in  
113 lateral frontal and temporal cortex. These regions support lexico-semantic processing (word  
114 meanings) and combinatorial morpho-syntactic and semantic processing (e.g., Fedorenko et al.,  
115 2010, 2012, 2016, 2020; Bautista & Wilson, 2016; Blank et al., 2016; Anderson et al., 2018;  
116 Reddy & Wehbe, 2020). Responses to linguistic stimuli generalize across different materials,  
117 tasks, modalities of presentation (reading vs. listening), languages, and developmental

## Language vs. ToM Networks in Naturalistic Stimulus Tracking

118 trajectories (e.g., Fedorenko et al., 2010; Bedny et al., 2011; Fedorenko, 2014; Scott et al., 2017;  
119 Diachek, Blank, Siegelman et al., 2020; Ayyash, Malik-Moraleda et al., in prep.; Ivanova et al.,  
120 in prep.). In contrast to these robust and consistent responses to linguistic stimuli, these regions  
121 do not respond to a wide range of non-linguistic cognitive processes, including arithmetic  
122 processing, music perception, executive function tasks, action or gesture observation, non-verbal  
123 social-cognitive tasks, and the processing of computer code (e.g., Fedorenko et al., 2011; Monti  
124 et al., 2012; Pritchett et al., 2018; Almaric & Dehaene, 2018; Paunov, 2019; Jouravlev et al.,  
125 2019; Ivanova et al., 2020; Shain, Paunov et al., in prep.; see Fedorenko & Varley, 2016 for a  
126 review).

127  
128 *ToM network*. Attribution of mental states, such as beliefs, desires, and intentions, engages a  
129 network of brain regions in bilateral temporo-parietal cortex and anterior and posterior regions  
130 along the cortical midline. These responses generalize across the type of mental state, its specific  
131 content or format (linguistic vs. pictorial), and the source of evidence for it (e.g., Fletcher et al.,  
132 1995; Castelli et al., 2000; Gallagher et al., 2000; Vogeley et al., 2001; Ruby & Decety, 2003;  
133 Saxe & Kanwisher, 2003; Saxe, Schulz, & Jiang, 2006; Jacoby et al., 2016; see Koster-Hale &  
134 Saxe, 2013 for review) as well as across populations with diverse cultural backgrounds or  
135 developmental experiences (e.g., Callaghan et al., 2005; Sabbagh et al., 2006; Shahaecian et al.,  
136 2011; Koster-Hale, Bedny, & Saxe, 2014; Richardson et al., 2018, 2020). However, by  
137 adulthood, these regions, and especially the most selective component of the ToM network, the  
138 right temporo-parietal junction (RTPJ), do not respond to social stimuli, like faces, voices, or  
139 biological motion (e.g., Deen et al., 2015), to general executive demands (e.g., Saxe, Schulz, &  
140 Jiang, 2006), to physical or broadly social attributes of agents, or to attribution of bodily

## Language vs. ToM Networks in Naturalistic Stimulus Tracking

141 sensations of pain and hunger (e.g., Saxe & Powell, 2006; Bruneau, Pluta & Saxe, 2012; Jacoby  
142 et al., 2016).

143

144 Together, these two lines of work support the notion that language and ToM are ‘natural  
145 kinds’—distinct cognitive faculties that carve human nature at the joints—each one mapping  
146 onto functionally specialized neural structures. Investigations of developmental and acquired  
147 disorders have provided convergent support for the dissociability of language and ToM.

148 Individuals with even severe aphasia appear to retain the capacity for mental state reasoning as  
149 long as non-verbal materials are used (e.g., Varley & Siegal, 2000; Varley, Siegal & Want, 2001;  
150 Apperly et al., 2006; Willems et al., 2011; see Fedorenko & Varley, 2016 for review). And at  
151 least some individuals with social, ToM-related impairments (e.g., individuals with autism  
152 spectrum disorders) show preservation of lexical and syntactic linguistic abilities (e.g., Frith &  
153 Happe, 1994; Wilkinson, 1998; Tager-Flusberg, Paul & Lord, 2005; Tager-Flusberg, 2006). But  
154 as noted above, most of this evidence has come from traditional, task-based experimental  
155 paradigms, and such paradigms are well-suited to the divide-and-conquer enterprise, but may  
156 overestimate the degree of separation. Indeed, Paunov et al. (2019) recently examined inter-  
157 regional functional correlations within and between the language and ToM networks during  
158 naturalistic cognition paradigms, like story comprehension, and found that in spite of their  
159 dissociability (stronger within- than between-network correlations), the language and ToM  
160 networks also showed a significant amount of synchronization in their neural activity. These  
161 results point to some degree of functional integration between the networks. Furthermore, several  
162 prior studies have argued for the importance of social content / communicative intent in the  
163 linguistic signal for eliciting responses in the language areas (e.g., Mellem et al., 2016; Redcay et

## Language vs. ToM Networks in Naturalistic Stimulus Tracking

164 al., 2016). Here, we adopt an approach that relies on the use of rich naturalistic stimuli but allows  
165 us to not only examine the structure of and the relationship between the networks, but to also ask  
166 what stimulus features each network “tracks” through the inter-subject correlation approach (e.g.,  
167 Hasson et al., 2004, 2008).

168

## 169 **2. Materials and Methods**

170

### 171 ***2.1. General approach.***

172

173 Following Blank & Fedorenko (2017, 2020), we combine two powerful methodologies, which  
174 have previously been productively applied separately in the domains of language and social  
175 cognition. In particular, we use *functional localization* (e.g., Brett et al., 2002; Saxe et al., 2006;  
176 Fedorenko et al., 2010) to identify the two networks of interest in individual subjects, and *inter-*  
177 *subject correlations* (ISCs; e.g., Hasson et al., 2004, 2008) to examine the degree to which these  
178 networks track different stimulus features during the processing of rich naturalistic materials.  
179 Here, we highlight key strengths of each approach and consider their synergistic advantages  
180 given our current goals.

181

182 Naturalistic paradigms have become a crucial complement to traditional, task-based studies in  
183 cognitive neuroscience. The obvious advantage of naturalistic paradigms is their high ecological  
184 validity: by giving up a measure of experimental control, it becomes possible to study cognition  
185 “in the wild” (Blank & Fedorenko, 2017; see e.g., Sonsukare et al., 2019 and Nastase et al., 2020  
186 for general discussions). In particular, one can examine how coherent and structured mental



## Language vs. ToM Networks in Naturalistic Stimulus Tracking

187 representations are extracted from rich and noisy perceptual inputs, which is what happens in  
188 everyday cognition. This is in contrast to trying to artificially isolate various features of these  
189 perceptual inputs, as is typically done in constrained experimental tasks. Naturalistic paradigms  
190 have been argued to elicit more reliable responses compared to traditional, task-based paradigms  
191 (Hasson et al., 2010), perhaps because they are generally more engaging, and can enable  
192 discoveries of functional relationships among brain regions and networks that are altogether  
193 missed in more constrained settings (e.g., Gallivan, Cavina-Pratesi & Culham, 2009). Another  
194 advantage of naturalistic paradigms is their hypothesis-free nature. Through the use of  
195 naturalistic materials, researchers impose minimal design constraints to investigate the domain of  
196 interest in a manner that is maximally unbiased by prior theoretical assumptions. In effect, they  
197 are letting the data speak for itself.

198  
199 However, naturalistic paradigms also come with an inherent analytic challenge: how do we make  
200 sense of data acquired without the typical constraints of standard hypothesis-driven modeling  
201 approaches? Hasson et al. (2004) pioneered an approach to tackle this challenge, known as the  
202 inter-subject correlation (ISC) approach (see Hasson et al., 2008, for an overview), which we  
203 adopt in the current study. The key insight behind the ISC approach is that we can model any  
204 given participant's fMRI signal time series using another participant's or other participants' time  
205 series: if a voxel, brain region, or brain network 'tracks' features of the stimulus during which  
206 the time series were obtained, then fMRI signal fluctuations will be stimulus-locked, resulting in  
207 similar time courses across participants (i.e., high inter-subject correlations).

208

## Language vs. ToM Networks in Naturalistic Stimulus Tracking

209 ISCs have been used in several studies of narrative comprehension (e.g., Wilson et al., 2007;  
210 Lerner et al., 2011; Honey et al., 2012; Regev et al., 2013; Silber et al., 2014; Schmäzle et al.,  
211 2015; Blank & Fedorenko, 2017, 2020), and whole-brain voxel-wise analyses have revealed high  
212 inter-subject correlations across large swaths of cortex that resemble the union of the language  
213 and ToM networks. On their own, these results might be taken as *prima facie* evidence for non-  
214 dissociability of language and ToM, given that the two networks appear to be jointly recruited.  
215 And insofar as the mental processes recruited in narrative comprehension recapitulate those used  
216 in everyday abstract cognition—an assumption that, we take it, partially justifies the interest in  
217 narratives in cognitive science and neuroscience (e.g., Finlayson & Winston, 2011; Willems et  
218 al., 2020)—the results may be taken to suggest the non-dissociability of language and ToM more  
219 generally.

220  
221 However, it is difficult to draw inferences from these studies about the *relative* contributions of  
222 the language and ToM networks to narrative comprehension for two reasons. First, in whole-  
223 brain analyses, ISCs are computed on a voxel-wise basis: individual brains are normalized to a  
224 stereotaxic template, and one-to-one voxel correspondence across individuals is then assumed in  
225 computing the ISCs. This is problematic because i) inter-individual variability is well established  
226 in the high-level association cortex (e.g., Fischl et al., 2008; Frost & Goebel, 2012; Tahmasebi et  
227 al., 2012), so any given voxel may belong to functionally distinct regions across participants; and  
228 ii) there is no independent criterion based on which an anatomical location can be interpreted as  
229 belonging to the language vs. the ToM network, thus necessitating reliance on the fallacious  
230 “reverse inference” (Poldrack, 2006) to interpret the resulting topography (see Fedorenko, 2021,  
231 for discussion). And second, traditional whole-brain analyses typically include all voxels that

## Language vs. ToM Networks in Naturalistic Stimulus Tracking

232 showed significant (above baseline) ISCs, thus potentially obscuring large differences in effect  
233 sizes (cf. Blank & Fedorenko, 2017; see Chen, Taylor & Cox, 2017, for a general discussion of  
234 the importance of considering effect sizes in interpreting fMRI findings). Combining the ISC  
235 approach with individual-participant functional localization enables us to identify and directly  
236 compare the networks of interest (including with respect to effect sizes), as well as to relate the  
237 findings straightforwardly to the prior literature on the language and ToM networks. In the  
238 current study, we therefore identified the language and ToM networks using well-established  
239 functional localizers (Saxe & Kanwisher, 2003; Fedorenko et al., 2010), and then examined the  
240 degree of inter-subject synchronization in those regions during the processing of diverse  
241 naturalistic linguistic and non-linguistic conditions varying in the presence of mental state  
242 content. If the language and ToM networks are dissociable during naturalistic cognition, we  
243 would expect the language regions to track linguistic stimuli, including those that lack mental  
244 state content, and the ToM regions to track stimuli that have mental state content, including both  
245 linguistic and non-linguistic ones.

246

### 247 ***2.2. Experimental design and statistical analyses***

248

249 Our overall design and analytic strategy were as follows: participant-specific regions that  
250 responded more strongly during the reading of sentences compared with lists of nonwords were  
251 defined as regions of interest comprising the language network. Similarly, regions that responded  
252 more strongly to stories about others' beliefs vs. stories about physical reality were defined as  
253 regions of interest comprising the ToM network. Whereas the precise anatomical locations of  
254 these regions were allowed to vary across participants, their overall topography was constrained

## Language vs. ToM Networks in Naturalistic Stimulus Tracking

255 by independently derived criteria to establish functional correspondence across brain regions of  
256 different participants (e.g., Fedorenko et al., 2010; Julian et al., 2012).

257  
258 Activity in these two sets of brain regions was recorded with fMRI while participants listened to  
259 or watched a series of naturalistic stimuli, as detailed below. For each region in each network,  
260 our critical dependent variable was the strength of the correlation between each participant's  
261 time series and the average time series from the rest of the participants. The group-averaged ISC  
262 in each region was tested for significance via a permutation test of the time series data. For our  
263 critical analysis, all individual ISC values were modeled using a linear mixed-effects regression  
264 with participant, brain region, and stimulus (what we call 'condition' below) as random effects.

265

### 266 **2.3. Participants**

267

268 Forty-seven native English speakers (age 19-48,  $M = 24.5$ ,  $SD = 5.08$ ; 30 female) from MIT and  
269 the surrounding Boston community participated for payment. Forty participants were right-  
270 handed, as determined by the Edinburgh handedness inventory (Oldfield 1971) or by self-report  
271 ( $n=1$ ). All seven left-handed participants showed typical left lateralization in the language  
272 localizer task described below (see Willems et al., 2014, for arguments to include left handers in  
273 cognitive neuroscience research). Four participants were excluded from the analyses due to poor  
274 quality of the localizer data (2 for ToM localizer, 1 for language localizer, and 1 for both), with  
275 the exclusion criterion defined as fewer than 100 suprathreshold voxels (at the  $p < 0.001$   
276 uncorrected whole-brain threshold) across the respective network's masks (see below), bringing  
277 the number of participants included in the critical analyses to 43. All participants gave informed

## Language vs. ToM Networks in Naturalistic Stimulus Tracking

278 consent in accordance with the requirements of MIT’s Committee on the Use of Humans as  
279 Experimental Subjects (COUHES).

280

### 281 *2.4. Stimuli and procedure*

282

283 Each participant completed a language localizer, a ToM localizer, a localizer for the domain-  
284 general Multiple Demand (MD) system (used in a replication analysis, as described below), and  
285 a subset, or all, of the critical naturalistic stimuli (‘conditions’) (between 1 and 7) due to scan  
286 duration constraints (18 participants completed all 7 conditions of interest, 1 participant  
287 completed 6 conditions, 10 participants completed 5 conditions, 1 participant completed 4  
288 conditions, 1 participant completed 3 conditions, 7 participants completed 2 conditions, and 5  
289 participants completed 1 condition). Each condition was presented to between 28 and 32  
290 participants (see **Table 1**). Each stimulus, lasting ~5-7 minutes (see **Table 1** for precise  
291 durations), was preceded and followed by 16 s of fixation. Finally, ten participants performed a  
292 resting state scan, used in one of the reality-check analyses, as described below. For the language  
293 localizer, 36/43 participants completed it in the same session as the critical conditions, the  
294 remaining 7 participants completed it in an earlier session. Similarly, for the ToM and MD  
295 localizers, 37/43 participants completed them in the same session as the critical conditions, the  
296 remaining 6 participants completed them in an earlier session.

297

298

## Language vs. ToM Networks in Naturalistic Stimulus Tracking

| Condition                    | Duration | N <sub>299</sub>  |
|------------------------------|----------|-------------------|
| <b>+Lang +ToM</b>            |          |                   |
| Story                        | 5m 16s   | 31 <sup>300</sup> |
| Audio play                   | 6m 14s   | 29 <sup>301</sup> |
| Dialog                       | 5m 35s   | 28                |
| <b>-Lang +ToM</b>            |          |                   |
| Animated short film          | 5m 48s   | 32 <sup>303</sup> |
| Live action movie clip       | 6m 10s   | 30                |
| Intentional shapes animation | 4m 50s   | 30 <sup>304</sup> |
| <b>+Lang -ToM</b>            |          |                   |
| Expository text              | 7m 6s    | 28                |
| <b>-Lang -ToM (control)</b>  |          |                   |
| Resting state                | 5m 0s    | 10 <sup>307</sup> |

**Table 1.** Naturalistic conditions in each of the three conditions types of interest and reality-check (resting state), including durations, and number of participants per condition. Durations include 16 s fixations at the beginning and end of the scan (32 s total).

308

309 *Language localizer task.* The task used to localize the language network is described in detail in

310 Fedorenko et al. (2010) and targets brain regions that support high-level language processing.

311 Briefly, we used a reading task contrasting sentences and lists of unconnected, pronounceable

312 nonwords (**Figure 1**) in a blocked design with a counterbalanced condition order across runs.

313 Stimuli were presented one word / nonword at a time. Participants read the materials passively

314 (we included a button-pressing task at the end of each trial, to help participants remain alert). As

315 discussed in the introduction, this localizer is robust to task manipulations (e.g., Fedorenko et al.,

316 2010; Scott et al., 2017; Ivanova et al., in prep.). Moreover, this localizer identifies the same

317 regions that are localized with a broader contrast, between listening to natural speech and its

318 acoustically-degraded version (Scott et al., 2017; Ayyash, Malik-Moraleda et al., in prep.). All

319 participants completed two runs, each lasting 358 s and consisting of 8 blocks per condition and

320 5 fixation blocks. (A version of this localizer is available from <http://evlab.mit.edu/funcloc/>.)

321

## Language vs. ToM Networks in Naturalistic Stimulus Tracking

322 *ToM localizer task*. The task used to localize the ToM network is described in detail in Saxe &  
 323 Kanwisher (2003) and targets brain regions that support reasoning about others' mental states.  
 324 Briefly, the task was based on the classic false belief paradigm (Wimmer and Perner, 1983), and  
 325 contrasted verbal vignettes about false beliefs (e.g., a protagonist has a false belief about an  
 326 object's location; the critical condition) and linguistically matched vignettes about false physical  
 327 states (physical representations depicting outdated scenes, e.g., a photograph showing an object  
 328 that has since been removed; the control condition) (**Figure 1**) in a long-event-related design  
 329 with a counterbalanced order across runs (when multiple runs were administered). Stimuli were  
 330 presented one at a time. Participants read these vignettes and answered a true / false  
 331 comprehension question after each one. Forty-one participants completed two runs and two  
 332 completed one run due to time limitations, each lasting 262 s and consisting of 5 vignettes per  
 333 condition. (A version of this localizer is available from <http://saxelab.mit.edu/use-our-efficient-false-belief-localizer>.)  
 334

### Language

#### Sentences

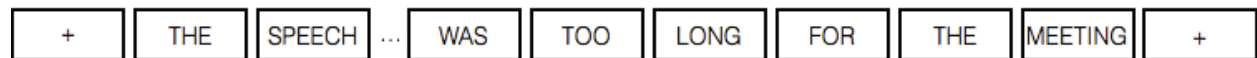

#### Non-words

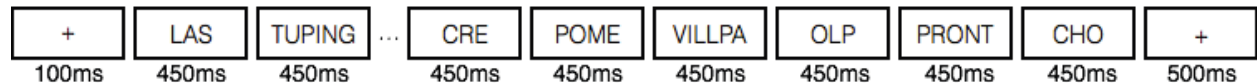

### Theory of Mind

#### False Belief

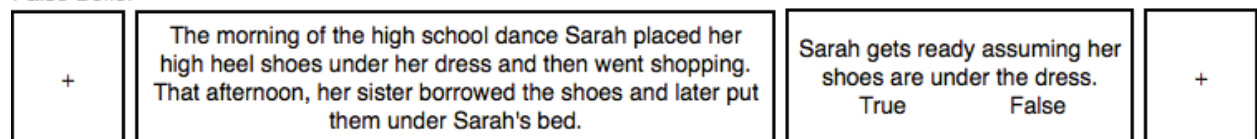

#### False Physical

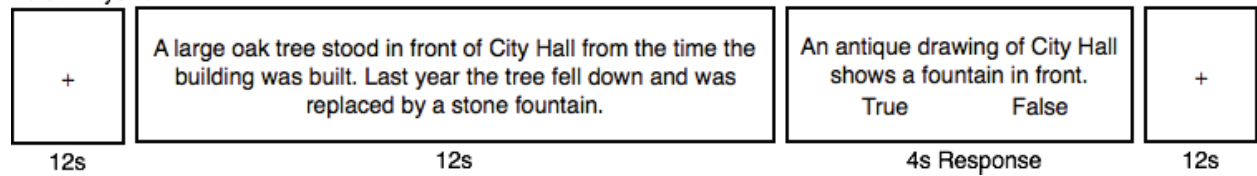

335

## Language vs. ToM Networks in Naturalistic Stimulus Tracking

336 **Figure 1.** *Sample trials from the functional localizer paradigms. Language: reading of*  
337 *sentences was contrasted with reading of sequences of pronounceable non-words (Fedorenko et*  
338 *al., 2010). ToM: reading of vignettes about false mental states was contrasted with reading of*  
339 *vignettes about false physical states, each followed by a true/false statement (Saxe & Kanwisher,*  
340 *2003).*

341  
342 *Multiple Demand (MD) localizer task* (used in a replication analysis, as described below). The  
343 task used to localize the MD network is described in detail in Fedorenko et al. (2011) and targets  
344 brain regions that support goal-directed effortful behaviors (e.g., Duncan, 2010, 2013). Briefly,  
345 we used a spatial working-memory task contrasting a harder version with an easier version  
346 (**Supplemental Figure A1**) in a blocked design with a counterbalanced condition order across  
347 runs (when multiple runs were administered). On each trial, participants saw a 3x4 grid and kept  
348 track of eight (hard version) or four (easy version) randomly generated locations that were  
349 sequentially flashed two at a time or one at a time, respectively. Then, participants indicated their  
350 memory for these locations in a two-alternative, forced-choice paradigm via a button press, and  
351 received feedback. Of the thirty-two participants included in the replication analysis (i.e., non-  
352 overlapping with those used in the original study in Blank & Fedorenko, 2017), twenty-three  
353 participants completed two runs of the localizer, and nine completed one run, each lasting 448 s  
354 and consisting of 6 blocks per condition and 4 fixation blocks.

355  
356 *The critical naturalistic task.* In the main experiment, each participant listened to (over scanner-  
357 safe Sensimetrics headphones) and/or watched a set of naturalistic stimuli (varying between 4  
358 min 50 s and 7 min 6 s in duration). Four of the conditions used linguistic materials: i) a story



## Language vs. ToM Networks in Naturalistic Stimulus Tracking

359 (“Elvis” from the Natural Stories corpus; Futrell et al., 2020), ii) an audio play (a segment from  
360 an HBO miniseries, “Angels in America”, from Chapter 1: “Bad News”,  
361 <https://www.imdb.com/title/tt0318997/>, audio only), iii) a naturalistic dialog—a casual  
362 unscripted conversation between two female friends (recorded by JG), and iv) a non-narrative  
363 expository text (a text about trees adapted from Wikipedia;  
364 <https://en.wikipedia.org/wiki/Tree>) (recorded by JG). The first three of the linguistic conditions  
365 were rich in mental state content; the fourth was meaningful naturalistic discourse with little/no  
366 mental state content. The three remaining conditions were videos with no linguistic content: i) an  
367 animated short film (“Partly Cloudy” by Pixar), ii) a clip from a live action film (“Mr. Bean”,  
368 [https://www.youtube.com/watch?v=bh\\_g-ZZ6WA](https://www.youtube.com/watch?v=bh_g-ZZ6WA)), and iii) a custom-created Heider and  
369 Simmel style animation (Heider & Simmel, 1944) consisting of simple geometric shapes moving  
370 in ways as to suggest intentional interactions designed to tell a story (e.g., a shape gets locked up  
371 inside a space, another shape goes on a quest to get help to release it, etc.). All three non-  
372 linguistic conditions were rich in mental state content. (Five additional conditions—included in  
373 some participants for another study—are of no interest to the current study.) All the materials  
374 will be made available on OSF (except in cases where copyright issues will prevent us from  
375 doing so). In the resting state scan, used for one of our reality-check analyses, as described  
376 below, participants were instructed to close their eyes and let their mind wander but to remain  
377 awake while resting in the scanner for 5 min (the scanner lights were dimmed and the projector  
378 was turned off).

379

### 380 ***2.5. Data acquisition and preprocessing***

381

## Language vs. ToM Networks in Naturalistic Stimulus Tracking

382 *Data acquisition.* Whole-brain structural and functional data were collected on a whole-body 3  
383 Tesla Siemens Trio scanner with a 32-channel head coil at the Athinoula A. Martinos Imaging  
384 Center at the McGovern Institute for Brain Research at MIT. T1-weighted structural images were  
385 collected in 176 axial slices with 1 mm isotropic voxels [repetition time (TR) = 2530 ms; echo  
386 time (TE) = 3.48 ms]. Functional, blood oxygenation level-dependent (BOLD) data were  
387 acquired using an EPI sequence with a 90° flip angle and using GRAPPA with an acceleration  
388 factor of 2; the following parameters were used: thirty-one 4-mm-thick near-axial slices acquired  
389 in an interleaved order (with 10% distance factor), with an in-plane resolution of 2.1 x 2.1 mm,  
390 FoV in the phase encoding (A >> P) direction 200 mm and matrix size 96 x 96 mm, TR = 2000  
391 ms and TE = 30 ms. The first 10 s of each run were excluded to allow for steady-state  
392 magnetization.

393  
394 *Spatial preprocessing.* Data preprocessing was performed with SPM12 (using default  
395 parameters, unless specified otherwise) and supporting, custom scripts in MATLAB.  
396 Preprocessing of anatomical data included normalization into a common space [Montreal  
397 Neurological Institute (MNI) template], resampling into 2 mm isotropic voxels, and  
398 segmentation into probabilistic maps of the gray matter, white matter (WM), and cerebro-spinal  
399 fluid (CSF). Preprocessing of functional data included motion correction (realignment to the  
400 mean image using second-degree b-spline interpolation), normalization (estimated for the mean  
401 image using trilinear interpolation), resampling into 2 mm isotropic voxels, smoothing with a 4  
402 mm FWHM Gaussian filter and high-pass filtering at 200 s.

403

## Language vs. ToM Networks in Naturalistic Stimulus Tracking

404 *Temporal preprocessing.* Additional preprocessing of data from the story comprehension runs  
405 was performed using the CONN toolbox (Whitfield-Gabrieli and Nieto-Castañón, 2012;  
406 <http://www.nitrc.org/projects/conn>) with default parameters, unless specified otherwise. Five  
407 temporal principal components of the BOLD signal time courses extracted from the WM were  
408 regressed out of each voxel's time course; signal originating in the CSF was similarly regressed  
409 out. Six principal components of the six motion parameters estimated during offline motion  
410 correction were also regressed out, as well as their first time derivative. Next, the residual signal  
411 was bandpass filtered (0.01 – 0.1 Hz) to preserve only low-frequency signal fluctuations (Cordes  
412 et al., 2001). This filtering did not influence the results reported below.

413

### 414 ***2.6. Participant-specific functional localization of the language and ToM (and MD, for a*** 415 ***replication analysis) networks***

416

417 *Modeling localizer data.* For each localizer task, a standard mass univariate analysis was  
418 performed in SPM12 whereby a general linear model estimated the effect size of each condition  
419 in each experimental run. These effects were each modeled with a boxcar function (representing  
420 entire blocks) convolved with the canonical hemodynamic response function. The model also  
421 included first-order temporal derivatives of these effects, as well as nuisance regressors  
422 representing entire experimental runs and offline-estimated motion parameters. The obtained  
423 weights were then used to compute the functional contrast of interest: for the language localizer,  
424 sentences > nonwords, for the ToM localizer false belief > false photo, and for the MD localizer  
425 (replication analysis; see Stimuli and Procedure), hard > easy spatial working memory.

426

## Language vs. ToM Networks in Naturalistic Stimulus Tracking

427 *Defining fROIs.* Language and ToM (and MD, in the replication analysis) functional regions-of-  
428 interest (fROIs) were defined individually for each participant based on functional contrast maps  
429 from the localizer experiments (a toolbox for this procedure is available online;  
430 <https://evlab.mit.edu/funcloc/>). These maps were first restricted to include only gray matter  
431 voxels by excluding voxels that were more likely to belong to either the WM or the CSF based  
432 on SPM's probabilistic segmentation of the participant's structural data.  
433  
434 Then, fROIs in the language network were defined using group-constrained, participant-specific  
435 localization (Fedorenko et al., 2010). For each participant, the map of the sentences > nonwords  
436 contrast was intersected with binary masks that constrained the participant-specific language  
437 network to fall within areas where activations for this contrast are relatively likely across the  
438 population. These masks are based on a group-level representation of the contrast obtained from  
439 a previous sample. We used five such masks in the left-hemisphere, including regions in the mid-  
440 to-posterior and anterior temporal lobe, as well as in the middle frontal gyrus, the inferior frontal  
441 gyrus, and its orbital part (**Figure 3**). A version of these masks is available online  
442 (<https://evlab.mit.edu/funcloc/>). In each of the resulting 5 masks, a participant-specific language  
443 fROI was defined as the top 10% of voxels with the highest contrast values. This top  $n\%$   
444 approach ensures that fROIs can be defined in every participant and that their sizes are the same  
445 across participants, allowing for generalizable results (Nieto-Castañon and Fedorenko, 2012).  
446  
447 For the ToM fROIs, we used masks derived from a group-level representation for the false belief  
448 > false physical contrast in an independent group of 462 participants (Dufour et al., 2013). These  
449 masks included regions in the left and right temporo-parietal junction (L/RTPJ), precuneus /

## Language vs. ToM Networks in Naturalistic Stimulus Tracking

450 posterior cingulate cortex (L/RPC), and dorsal medial prefrontal cortex (**Figure 3**). A version of  
451 these masks is available online (available for download from [http://saxelab.mit.edu/use-our-](http://saxelab.mit.edu/use-our-theory-mind-group-maps)  
452 theory-mind-group-maps), but the masks were edited as follows: the RSTS (right superior  
453 temporal sulcus) mask was excluded, as it covers the entire STS, which is known to show  
454 complex functional organization, with reduced ToM selectivity (Deen et al., 2015). The middle-  
455 and ventral-medial prefrontal cortex (MMPFC and VMPFC) masks were also excluded to reduce  
456 the number of statistical comparisons in per-fROI analyses, but the dorsal MPFC and PC masks  
457 were split into left- and right-hemispheres, for a total of 6 masks.

458  
459 Additionally, for the replication analysis, fROIs in the MD network were defined based on the  
460 hard > easy contrast in the spatial working memory task. Here, instead of using binary masks  
461 based on group-level functional data, we used anatomical masks (Tzourio-Mazoyer et al., 2002;  
462 Fedorenko et al., 2013; Blank et al., 2014; Blank & Fedorenko, 2017). Nine masks were used in  
463 each hemisphere, including regions in the middle frontal gyrus and its orbital part, the opercular  
464 part of the inferior frontal gyrus, the precentral gyrus, the superior and inferior parts of the  
465 parietal lobe, the insula, the supplementary motor area, and the cingulate cortex (**Supplemental**  
466 **Figure A2**). (We note that functional masks derived for the MD network based on 197  
467 participants were largely overlapping with the anatomical masks; we chose to use the anatomical  
468 masks to maintain comparability between our functional data and data from previous studies that  
469 have used these masks.)

470  
471 In line with prior studies (e.g., Blank, Fedorenko & Kanwisher, 2014; Blank & Fedorenko, 2017;  
472 Paunov, Blank, & Fedorenko, 2019), the resulting fROIs showed small pairwise overlaps within

## Language vs. ToM Networks in Naturalistic Stimulus Tracking

473 individuals across networks, and overlapping voxels were excluded in fROI definition. In the  
474 current sample, the language-MD and ToM-MD overlaps were negligible, with a median overlap  
475 of 0 and average percentage overlap of less than 3% of voxels, on average across participants,  
476 relative to the total size of all fROIs in either network. Similarly, the language-ToM overlaps  
477 were also small relative to all fROIs in either network (6.3% of voxels, on average across  
478 participants, relative to the total number of voxels in language fROIs and 3.2% relative to all  
479 ToM fROIs). This overlap was localized entirely to one pair of fROIs: the LPostTemp language  
480 fROI and the LTPJ ToM fROI, and was more substantial relative to the total sizes of just these  
481 two fROIs: 38.6 voxels, on average across participants, i.e., 13.1% out of 295 total LPostTemp  
482 voxels, and 11.6% out of 332 total LTPJ voxels. We therefore repeated all key analyses without  
483 excluding these voxels in defining the fROIs. The results of these alternative analyses were  
484 qualitatively and statistically similar.

485

### 486 ***2.7. Reality check and replication analyses***

487

488 Prior to performing our critical analyses, we conducted two reality-check analyses and—in line  
489 with increasing emphasis in the field on robust and replicable science (e.g., Poldrack et al.,  
490 2017)—an analysis aimed at replicating and extending a previous ISC-based finding from our  
491 lab (Blank & Fedorenko, 2017).

492

493 *ISCs in perceptual cortices.* Anatomical ROIs were additionally defined in early visual and  
494 auditory cortex in all participants. For visual cortex, regions included inferior, middle, and  
495 superior occipital cortex bilaterally (six ROIs in total; masks available from

## Language vs. ToM Networks in Naturalistic Stimulus Tracking

496 <http://fmri.wfubmc.edu/software/PickAtlas>). For auditory cortex, regions included posteromedial  
497 and anterolateral sections of Heschl's gyrus bilaterally (4 ROIs in total; Morosan et al., 2001;  
498 these regions are based on post-mortem histology, and have been used in a number of previous  
499 fMRI papers). Signal extraction, ISC estimation, and inferential statistics were performed  
500 identically to the critical analyses (see Section 2.8). ISCs from these regions were used in a  
501 reality check (see Section 3.1), to ensure a double-dissociation obtains between visually and  
502 auditorily presented conditions in these perceptual regions.

503  
504 *Resting state ISCs.* A subset of ten participants (who completed 1-7 of the critical conditions)  
505 completed a resting state scan, which was included to ensure that data acquisition, preprocessing,  
506 and modelling procedures do not induce spurious ISCs. To this end, signal extraction, ISC  
507 estimation, and inferential statistics were performed identically to the critical analyses (see  
508 Section 2.8).

509  
510 *Replication analysis: Closer tracking of linguistic input by language regions than by domain-*  
511 *general Multiple Demand (MD) regions.* Blank & Fedorenko (2017) reported stronger ISCs  
512 during the processing of naturalistic linguistic materials in the language regions, compared to  
513 domain-general Multiple Demand (MD) regions. The MD network has been implicated in  
514 executive processes and goal-directed behavior (e.g., Duncan, 2010, 2013), including in the  
515 domain of language (e.g., see Fedorenko, 2014, for a review; cf. Diachek, Blank, Siegelman et  
516 al., 2020; Fedorenko & Shain, under review). We sought to replicate Blank & Fedorenko's key  
517 result in a new set of participants and to extend it to different types of linguistic materials.  
518 Specifically, the original study used narratives, including the narrative used in the present study

## Language vs. ToM Networks in Naturalistic Stimulus Tracking

519 along with three others. We expected the results to generalize to non-narrative linguistic  
520 conditions. Ten participants in our dataset (n=6 in the narrative condition) who also participated  
521 in the original study were excluded from this analysis. Again, signal extraction, ISC estimation,  
522 and inferential statistics were identical to the critical analyses (see Section 2.8).

523

### 524 **2.8. Critical analyses**

525 *Computing ISCs.* For each participant and fROI, BOLD signal time courses recorded during each  
526 naturalistic condition were extracted from each voxel beginning 6 s following the onset of the  
527 stimulus (to exclude an initial rise in the hemodynamic response relative to fixation, which could  
528 increase ISCs) and averaged across voxels. For each fROI, participant, and condition we  
529 computed an ISC value, namely, Pearson's moment correlation coefficient between the z-scored  
530 time course and the corresponding z-scored and averaged time course across the remaining  
531 participants (Lerner et al., 2011). ISCs were Fisher-transformed before statistical testing to  
532 improve normality (Silver and Dunlap, 1987).

533 *Statistical testing.* In each fROI, ISCs were then tested for significance against an empirical null  
534 distribution based on 1,000 simulated signal time courses that were generated by phase-  
535 randomization of the original data (Theiler et al., 1992). Namely, we generated null distributions  
536 for individual participants, fit each distribution with a Gaussian, and analytically combined the  
537 resulting parameters across participants. The true ISCs, also averaged across participants, were  
538 then z-scored relative to these empirical parameters and converted to one-tailed  $p$ -values.

539 ISCs were compared across networks and condition types using linear, mixed-effects  
540 regressions, implemented in Matlab 2020a. ISCs were modeled with maximal random effects



## Language vs. ToM Networks in Naturalistic Stimulus Tracking

541 structure appropriate for each analysis (Barr et al., 2013; Baayen et al., 2008), including random  
542 intercepts for participants, with random slopes for the effects of interest, and crossed random  
543 intercepts for fROI and condition. Hypothesis testing was performed with two-tailed tests over  
544 the respective model coefficients, with Satterthwaite approximation for the degrees of freedom.

545 Further analyses performed within networks across condition types or against the theoretical null  
546 distribution (i.e., testing the intercept term), as well as those per fROI within a network or per  
547 condition across networks, also always included maximal random effects on the remaining  
548 grouping variables. P-values in these analyses are reported following false discovery rate (FDR)  
549 correction for multiple comparisons (Benjamini and Yekutieli, 2001).

550 Lastly, in comparisons against baseline, per-fROI analyses against empirical null distributions  
551 are also reported, which aim to ensure that, at the finest grain (each individual fROI and  
552 condition, across participants), differences from baseline are independent of assumptions  
553 regarding data normality. These tests were also FDR corrected for multiple comparisons for all  
554 fROIs within a network, and across all seven conditions of interest.

555

### 556 **3. Results**

557

#### 558 *3.1. Results of reality check and replication analyses*

559

## Language vs. ToM Networks in Naturalistic Stimulus Tracking

560 *Reality check #1: ISCs in perceptual cortices.* We examined ISCs for the conditions of interest in

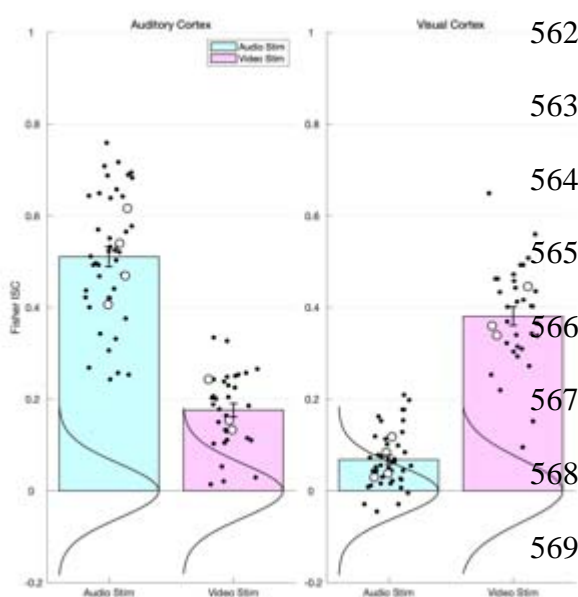

561 early auditory and visual cortex, grouping the  
562 conditions by presentation modality. As  
563 expected, we observed stronger ISCs for the  
564 auditory conditions in the auditory cortex, and  
565 stronger ISCs for the visual conditions in the  
566 visual cortex (**Figure 2**). The linear mixed-  
567 effects (LME) regression (see Methods)  
568 revealed a strong crossover interaction (beta =  
569 0.648, SE = 0.046,  $t(89.79) = 13.970$ ,  $p = 10^{-25}$ ).  
570

571 **Figure 2.** A reality-check analysis showing the expected double dissociation in ISCs in  
572 perceptual (visual and auditory) cortices. Bars correspond to Fisher-transformed inter-subject  
573 correlation (ISC) coefficients (Pearson's  $r$ ) in early visual and auditory cortex to the conditions  
574 of interest, grouped by modality of presentation (all +Language conditions: story, audio play,  
575 dialog, expository text were auditorily presented; the remaining conditions – animated short  
576 film, live action movie clip, and intentional shapes animation – were visually presented). Error  
577 bars are standard errors of the mean by participants. Black dots correspond to the individual  
578 participants' values. Large unfilled circles correspond to individual condition averages. Vertical  
579 curves are Gaussian fits to empirical null distributions.

580

581 Notably, we also observed that the visual areas weakly but reliably tracked the auditory

582 conditions (beta = 0.066, SE = 0.012,  $t(38.10) = 5.398$ ,  $p = 10^{-7}$ ), and the early auditory areas

## Language vs. ToM Networks in Naturalistic Stimulus Tracking

583 reliably tracked the visual conditions (beta = 0.175, SE = 0.020,  $t(24.15) = 8.573$ ,  $p = 10^{-10}$ ). We  
584 return to the interpretation of these effects in the Discussion. For the time being, we note that  
585 care must be taken in interpreting deviations of the ISCs during ‘active’ (cf. resting state)  
586 conditions from baseline.

587  
588 *Reality check #2: Resting state ISCs.* To exclude the possibility that the ISCs in the critical  
589 analyses are driven by scanner noise or preprocessing/analysis procedures, we measured ISCs  
590 across a subset of ten participants who were scanned in a 5-minute resting state condition  
591 (Hasson et al., 2004). The ISCs during rest did not significantly differ from baseline in either the  
592 language or ToM networks, as assessed with an LME regression, or against the empirical null  
593 distribution. This analysis suggests that any above-baseline ISCs for our critical conditions are  
594 not an artifact of data acquisition, preprocessing, or analysis procedures.

595  
596 *Replication analysis: Closer tracking of linguistic input by language regions than by domain-*  
597 *general Multiple Demand (MD) regions.* We successfully replicated the key finding for the  
598 narrative condition (beta = 0.181, SE = 0.039,  $t(34.89) = 4.664$ ,  $p = 10^{-5}$ ;  $p$  values are FDR-  
599 corrected for the four linguistic conditions), and extended it to the audio play (beta = 0.307, SE =  
600 0.052,  $t(34.23) = 5.944$ ,  $p = 10^{-7}$ ), the dialogue (beta = 0.157, SE = 0.039,  $t(33.05) = 4.014$ ,  $p =$   
601  $10^{-5}$ ), and the expository text (beta = 0.129, SE = 0.036,  $t(36.75) = 3.543$ ,  $p = 10^{-4}$ ) conditions  
602 (**Supplemental Figure A3**). These results suggest that across diverse kinds of linguistic stimuli,  
603 the language network’s activity is more tightly coupled with the inputs, compared to the domain-  
604 general MD regions’ activity.

605

## Language vs. ToM Networks in Naturalistic Stimulus Tracking

### 606 **3.2. Results of critical analyses**

607

608 *Evidence for dissociation between the language and ToM networks in direct network*

609 *comparisons.*

610

611 We tested three key predictions, which, if supported, provide evidence in favor of language-ToM

612 dissociability in naturalistic settings. First, the ToM network should track conditions rich in ToM

613 content irrespective of whether these conditions are linguistic or non-linguistic, whereas the

614 language network should track linguistic conditions more strongly than non-linguistic ones.

615 Indeed, we found a network (language, ToM) x condition type (*linguistic*: narrative, audio play,

616 dialog, expository text; *non-linguistic*: animated film, live action film clip, Heider & Simmel-

617 style animation) interaction (beta = 0.191, SE = 0.059,  $t(84.06) = 3.270$ ,  $p = 0.002$ ). We also

618 found main effects of condition type and network: the linguistic conditions were—on average

619 across networks—tracked more strongly than the non-linguistic conditions (beta = 0.124, SE =

620 0.0459,  $t(96.47) = 2.700$ ,  $p = 0.008$ ), and the language network tracked the conditions more

621 strongly, on average, than the ToM network (beta = 0.096, SE = 0.039,  $t(86.87) = 2.487$ ,  $p =$

622 0.015).

623

624 Second, for non-linguistic conditions, the ToM network should exhibit stronger tracking of

625 conditions with mental state content than the language network. Indeed, the ToM network

626 showed higher ISCs than the language network (beta = 0.095, SE = 0.043,  $t(35.59) = 2.197$ ,  $p =$

627 0.035).

628

## Language vs. ToM Networks in Naturalistic Stimulus Tracking

629 And third, for the linguistic condition without mental state content (the expository text), the  
 630 language network should exhibit stronger tracking than the ToM network. Indeed, the language  
 631 network showed higher ISCs than the ToM network (beta = 0.111, SE = 0.044,  $t(19.10) = 2.507$ ,  
 632  $p = 0.021$ ).

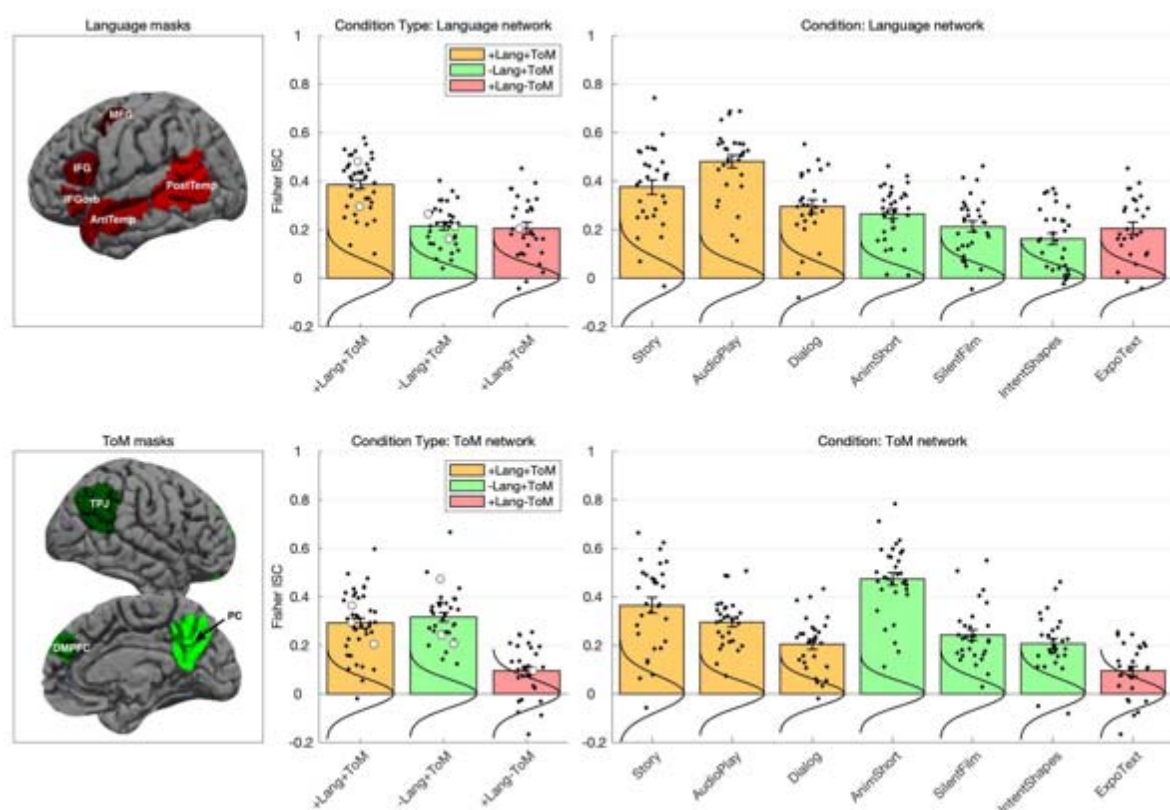

633  
 634  
 635 **Figure 3. Left.** Masks within which individual functional regions of interest (fROIs) were defined  
 636 for each network: Language (Top, red): IFGorb, inferior frontal gyrus, orbital portion; IFG,  
 637 inferior frontal gyrus; MFG, middle frontal gyrus; AntTemp, anterior temporal cortex;  
 638 PostTemp, posterior temporal cortex (only the classic, left-hemisphere language regions were  
 639 included in all analyses). ToM (Bottom, green): TPJ, temporoparietal junction; DMPFC,  
 640 dorsomedial prefrontal cortex; PC, posterior cingulate cortex and precuneus. Both the right-  
 641 hemisphere (shown) and left-hemisphere ToM regions were included (six regions total). **Middle.**

## Language vs. ToM Networks in Naturalistic Stimulus Tracking

642 *Average inter-subject correlations (ISCs) per condition type in the language (top) and ToM*  
643 *(bottom) networks. Bars correspond to Fisher-transformed ISC coefficients (Pearson's  $r$ ),*  
644 *averaged across regions of interest within each network, separately per condition. Colors*  
645 *represent condition types: +Lang+ToM, orange, -Lang+ToM, green, +Lang-ToM, red. Error*  
646 *bars are standard errors of the mean by participants. Black dots correspond to the individual*  
647 *participants' values. Large unfilled circles correspond to individual condition averages, shown*  
648 *individually in the right-most panels. Vertical curves are Gaussian fits to empirical null*  
649 *distributions. The key pattern is as follows. The ToM network tracks +ToM materials in both*  
650 *+Linguistic and -Linguistic conditions, but shows weak tracking of the -ToM stimulus. The*  
651 *language network preferentially tracks +Linguistic materials over -Linguistic ones, and it tracks*  
652 *+Linguistic materials in both +ToM and -ToM conditions. **Right.** ISCs per individual*  
653 *naturalistic stimuli ('conditions'); conventions are as in middle panels.*  
654  
655 *A more detailed characterization of the two networks' ISC profiles.*  
656  
657 In this section, we examine more closely the detailed pattern of ISCs in the two networks of  
658 interest. The first aim of these analyses is to establish that the observed dissociation is not driven  
659 by particular conditions or regions within the networks, but rather, that different aspects of the  
660 data provide convergent support for the dissociation. The second aim is to highlight aspects of  
661 the ISC pattern that are not consistent with a complete language-ToM dissociation, and thus to  
662 evaluate the strength of counter-evidence in favor of the null hypothesis, that language and ToM  
663 are not dissociable in naturalistic cognition (see **Supplemental Figure B1** for ISCs per fROI for  
664 each network and condition).

## Language vs. ToM Networks in Naturalistic Stimulus Tracking

665

666 *ToM network*. First, the ToM network reliably tracked each of the six conditions with mental  
667 state content: story (beta = 0.363, SE = 0.037,  $t(26.55) = 9.693$ ,  $p = 10^{-10}$ );  $p$  values are FDR-  
668 corrected for seven conditions—we are including all conditions in the correction, not only the  
669 +ToM conditions), audio play (beta = 0.295, SE = 0.028,  $t(10.54) = 10.716$ ,  $p = 10^{-7}$ ), dialog  
670 (beta = 0.203, SE = 0.026,  $t(16.40) = 7.797$ ,  $p = 10^{-7}$ ), animated short (beta = 0.472, SE = 0.053,  
671  $t(9.35) = 8.830$ ,  $p = 10^{-6}$ ), live action film (beta = 0.241, SE = 0.035,  $t(11.18) = 6.869$ ,  $p = 10^{-6}$ ),  
672 and Heider & Simmel (H&S) style animation (beta = 0.205, SE = 0.026,  $t(15.72) = 7.838$ ,  $p =$   
673  $10^{-7}$ ). Moreover, in tests against the empirical null distributions these effects were significant in  
674 every ToM fROI with the exception of the Dialog condition in the RH Posterior  
675 Cingulate/Precuneus, (all other  $ps < 0.04$ , FDR-corrected for the six fROIs and seven  
676 conditions).

677

678 Second, the ToM network showed no preference for linguistic vs. non-linguistic conditions with  
679 mental state content (beta = 0.018, SE = 0.043,  $t(49.74) = 0.675$ , *n.s.*), consistent with these  
680 regions' role in representing mental states irrespective of how this information is conveyed (e.g.,  
681 Jacoby et al., 2016).

682

683 And third, the ToM network tracked the linguistic conditions with mental state content (story,  
684 audio play, dialog) more strongly than the one without mental state content (expository text)  
685 (beta = 0.199, SE = 0.037,  $t(30.69) = 5.344$ ,  $p = 10^{-7}$ ), suggesting that the network represents  
686 mental state information in linguistic signals, rather than the linguistic signal itself. However, the  
687 ToM network did exhibit weaker but significantly above-baseline tracking of the expository text

## Language vs. ToM Networks in Naturalistic Stimulus Tracking

688 (beta = 0.093,  $SE = 0.022$ ,  $t(22.22) = 4.165$ ,  $p = 0.001$ ). In per-fROI tests against the empirical  
689 null distributions, this effect was only reliable in the LTPJ ( $p = 0.015$ ; all other  $ps > 0.05$ ; FDR-  
690 corrected for the six fROIs). We consider possible explanations in the Discussion.

691  
692 *Language network.* First, the language network reliably tracked each of the three linguistic  
693 conditions with mental state content: story (beta = 0.374,  $SE = 0.041$ ,  $t(13.27) = 9.171$ ,  $p = 10^{-7}$ ;  
694  $p$  values are FDR-corrected for seven conditions), audio play (beta = 0.479,  $SE = 0.046$ ,  $t(8.75) =$   
695  $10.370$ ,  $p = 10^{-6}$ ), and dialog ( $r = 0.294$ ,  $SE = 0.045$ ,  $t(9.72) = 6.491$ ,  $p = 10^{-4}$ ). Moreover, these  
696 effects were significant in every language fROI, in tests against the empirical null distributions  
697 ( $ps < 0.01$ , FDR-corrected for the five fROIs and seven conditions).

698  
699 Second, importantly, the language network also reliably tracked the linguistic condition with no  
700 mental state content (beta = 0.204,  $SE = 0.044$ ,  $t(8.72) = 4.668$ ,  $p = 10^{-4}$ ), and this effect, too, was  
701 significant in every language fROI ( $ps < 0.03$ , FDR-corrected for the five fROIs). This result  
702 suggests that mental state content is not necessary to elicit reliable ISCs in the language network.

703  
704 And third, the language network showed stronger tracking of linguistic relative to non-linguistic  
705 conditions with mental state content, (beta = 0.177,  $SE = 0.043$ ,  $t(43.54) = 4.155$ ,  $p = 10^{-5}$ ). This  
706 result suggests a special role for linguistic input in driving the network's responses.

707  
708 However, the language network exhibited some patterns that might be taken to suggest that  
709 mental state content—or social information more generally—is, to some extent, important for  
710 linguistic processing. First, the language network tracked the linguistic conditions with mental



## Language vs. ToM Networks in Naturalistic Stimulus Tracking

711 state content more strongly than the linguistic condition with no mental state content, i.e., the  
712 expository text ( $\beta = 0.188$ ,  $SE = 0.061$ ,  $t(25.67) = 3.050$ ,  $p = 0.005$ ). This result may be taken  
713 to suggest that mental state content contributes to the language network's input tracking over and  
714 above the linguistic content alone. This interpretation warrants caution, however. In particular,  
715 reflecting the general challenges of naturalistic stimuli (see Discussion), the linguistic condition  
716 with no mental state content is not matched to the linguistic conditions with mental state content  
717 on various potentially relevant features, from how engaging they are, which could influence the  
718 depth of linguistic encoding, to specifically linguistic properties (e.g., lexical and syntactic  
719 complexity), which could also affect the strength of ISCs (e.g., Shain, Blank et al., 2020; Wehbe  
720 et al., 2021). Furthermore, only a single linguistic condition with no mental state content was  
721 included in the current study, making it difficult to rule out idiosyncratic features driving the  
722 difference.

723  
724 And second, the above-baseline ISCs in the language network for the non-linguistic conditions—  
725 although weaker than those for the linguistic conditions—are also notable, suggesting some  
726 degree of reliable tracking in the language network for non-linguistic meaningful information  
727 (see also Ivanova et al., 2020 for evidence of reliable responses in the language network to visual  
728 events).

729

### 730 **4. Discussion**

731  
732 Much prior work in cognitive neuroscience has suggested—based on traditional controlled  
733 experimental paradigms—that the network of brain regions that support linguistic interpretation

## Language vs. ToM Networks in Naturalistic Stimulus Tracking

734 and the brain regions that support mental state reasoning are distinct (e.g., Saxe & Kanwisher,  
735 2003; Mason & Just, 2009; Fedorenko et al., 2011; Mar, 2011; Deen et al., 2015; Paunov, 2019).  
736 However, such paradigms differ drastically from real-world cognition, where we process rich  
737 and complex information. And linguistic and social cognition seem to be strongly intertwined in  
738 everyday life. Here, we tested whether the language and Theory of Mind networks are  
739 dissociated in their functional profiles as assessed using the inter-subject correlation (ISC)  
740 approach, where neural activity patterns are correlated across individuals during the processing  
741 of naturalistic materials (e.g., Hasson et al., 2004, 2008). Following Blank & Fedorenko (2017),  
742 we combined the ISC approach with the power of individual-participant functional localization  
743 (e.g., Brett et al., 2002; Saxe et al., 2006; Fedorenko et al., 2010; Nieto-Castañón & Fedorenko,  
744 2012). This synergistic combination has two key advantages over the whole-brain voxel-wise  
745 ISC approach, where individual brains are first anatomically aligned and, then, each stereotaxic  
746 location serves as a basis for comparing signal time courses across participants. First, relating the  
747 resulting cortical topography of ISCs to the topography of known functional brain networks can  
748 only proceed only through “reverse inference” based on anatomy (Poldrack, 2006; Fedorenko,  
749 2021). Instead, evaluating signal time courses from functionally defined regions ensures  
750 interpretability, and allows us to straightforwardly link our findings to the wealth of prior studies  
751 characterizing the response profiles of our two networks of interest. And second, this approach  
752 allows us to directly test the correlations in the language network against those in the ToM  
753 network. Such an explicit comparison between networks allows for stronger inferences compared  
754 with those licensed when each network is separately tested against a null baseline and differences  
755 across networks are indirectly inferred (e.g., see Nieuwenhuis et al., 2011, for discussion).  
756

## Language vs. ToM Networks in Naturalistic Stimulus Tracking

757 We examined the ISCs in the language and ToM networks during the processing of seven  
758 naturalistic conditions: three linguistic conditions with mental state content (+linguistic, +ToM),  
759 three non-linguistic conditions (silent animations and live action films) with social content but no  
760 language (-linguistic, +ToM), and a linguistic condition with no social content (+linguistic, -  
761 ToM). We found reliable differences in the ISC patterns between the language and ToM  
762 networks, in support of the hypothesis that language and Theory of Mind are dissociable even  
763 during the processing of rich and complex naturalistic materials. In particular, the ToM network  
764 tracked materials rich in mental state content irrespective of whether this content was presented  
765 linguistically or non-linguistically (see also Jacoby et al., 2016), but it showed only weak  
766 tracking of the stimulus with no mental state content. In contrast, the language network  
767 preferentially tracked linguistic materials over non-linguistic ones, and it did so regardless of  
768 whether these materials contained information about mental states.

769  
770 These results expand on the existing body of knowledge about language and social cognition,  
771 with both theoretical and methodological implications. Critically, the observed dissociation  
772 extends prior findings of dissociable functional profiles between the language and the ToM  
773 networks during task-based paradigms to rich naturalistic conditions. This result suggests that the  
774 two networks represent *different kinds of information*. (They may also perform *distinct*  
775 *computations* on the perceptual inputs, though the idea of a canonical computation carried out  
776 across the cortex is gaining ground (e.g., Keller & Mrcic-Flogel, 2018), and predictive  
777 processing seems like one likely candidate (e.g., Koster-Hale & Saxe, 2013; Shain, Blank et al.,  
778 2020). In particular, the language regions appear to track linguistic features of the input (see also  
779 Shain, Blank et al., 2020; Wehbe et al., 2021). Our results extend prior findings from ISC

## Language vs. ToM Networks in Naturalistic Stimulus Tracking

780 paradigms (Wilson et al., 2008; Lerner et al., 2011; Honey et al., 2012; Regev et al., 2013;  
781 Silbert et al., 2014; Schmahajda et al., 2015; Blank & Fedorenko, 2017), which all used  
782 materials rich in mental state content, as is typical of linguistic information, to a stimulus that is  
783 largely devoid of information about mental states—an expository text. Strong tracking of the  
784 latter stimulus aligns with prior findings from task-based paradigms of robust responses to  
785 linguistic materials with little or no mental state content (e.g., Deen et al., 2015; Jacoby &  
786 Fedorenko, 2020). The ToM regions, in contrast, appear to track some features related to  
787 representing mental states across diverse kinds of representations (linguistic materials,  
788 animations, including highly abstract and minimalistic ones, and live action movies), again  
789 aligning with prior findings from task-based paradigms (e.g., Fletcher et al., 1995; Gallagher et  
790 al., 2000; Castelli et al., 2000; Vogeley et al., 2001; Ruby & Decety, 2003; Saxe & Kanwisher,  
791 2003; Saxe, Schulz, & Jiang, 2006; Jacoby et al., 2016). It is important to keep in mind that the  
792 fact that the two networks are dissociable does not imply that they do not interact. Indeed,  
793 Paunov et al. (2019) reported reliably above chance correlations in the patterns of inter-regional  
794 synchronization between the language and ToM networks, suggesting some degree of functional  
795 integration.

796  
797 On the methodological level, these results vindicate the divide-and-conquer strategy in general,  
798 and the functional localization approach (e.g., Brett et al., 2002; Saxe et al., 2006; Fedorenko et  
799 al., 2010) in particular. Language and Theory of Mind appear to be natural kinds, and the  
800 networks supporting the processing of linguistic vs. mental state information appear to be  
801 distinct, at least in adulthood (see also Braga et al., 2020). It is therefore justifiable to study each

## Language vs. ToM Networks in Naturalistic Stimulus Tracking

802 cognitive faculty and each network separately, although further probing the mechanisms of their  
803 potential interactions is equally important.

804

805 Although the overall pattern clearly supports a language-ToM dissociation between the two  
806 networks, some aspects of the results are not in line with a complete dissociation. In particular, i)  
807 the language regions show reliable tracking of non-linguistic conditions with mental state  
808 content; ii) the language regions show stronger tracking of linguistic conditions with than  
809 without mental state content; and iii) the ToM regions show weak but reliable tracking of the  
810 linguistic condition with no mental state content. These findings may be due to methodological  
811 limitations: the above-baseline ISCs (especially the relatively weak ones) may not reflect  
812 stimulus tracking. Although we have ruled out the possibility that the above-baseline ISCs are  
813 driven by acquisition, preprocessing, or analysis artifacts in our reality-check analysis of resting  
814 state data, they could be driven by other factors. For example, inter-network interactions (see  
815 Paunov et al., 2019) could induce ISCs, or the stimuli themselves may be too confounded to  
816 dissociate the respective contributions of language- and ToM-related components (for example,  
817 in linguistic stimuli, mental state attribution often requires particular syntactic structures—  
818 sentential complements).

819

820 More generally, the use of naturalistic materials, despite its advantages (e.g., Hasson et al., 2018;  
821 Sonsukare et al., 2019; Nastase et al., 2020), is associated with a host of challenges. The key one  
822 is that certain features are necessarily confounded in naturalistic settings, and can only be  
823 dissociated through careful experimentation and altering the natural statistics of the input.  
824 Relying on naturalistic materials alone can lead to wrong conclusions about the cognitive and

## Language vs. ToM Networks in Naturalistic Stimulus Tracking

825 neural architecture. This problem is especially pronounced in studying the relationship between  
826 language and social cognition given that language is primarily used in social settings and to share  
827 socially relevant information. The use of linguistic materials with no social information, and of  
828 non-linguistic mental-state-rich materials has been critical, here and in earlier studies, to uncover  
829 the dissociation that holds between the language and ToM systems. Another challenge associated  
830 with naturalistic materials is that they are difficult or altogether impossible to match for diverse  
831 properties bound to affect neural responses. Again, this problem presents a particular challenge  
832 in comparing responses to materials rich in social information vs. devoid of such information  
833 given that the former are, almost by definition, going to be more engaging and exciting given the  
834 social nature of primates, including humans (e.g., Aronson, 1980; Cheney & Seyfarth, 1990;  
835 Tomasello, 2014). Possible ways to address some of these concerns could involve a)  
836 characterizing the natural statistics of co-occurrences between linguistic and social processing in  
837 order to better understand how well the naturalistic stimuli reflect those statistics and to perhaps  
838 altering naturalistic conditions to allow dissociating features that commonly co-occur in life; b)  
839 carefully annotating naturalistic materials and performing reverse correlation analyses (e.g.,  
840 Hasson et al., 2004; Jacoby et al., 2016) in an effort to understand the precise features that elicit  
841 increases in neural responses in different brain regions; and c) developing novel neural analysis  
842 methods to isolate the components of neural signals attributable to a particular cognitive process  
843 / brain network (e.g., using analytic methods well-suited to high-dimensional data such as  
844 independent components analysis across both cortical space and large feature spaces  
845 representative of naturalistic environments (e.g., Norman-Haignere et al., 2015), or across both  
846 cortical space and time (e.g., probabilistic ICA, PICA; see Beckmann et al., 2005 for overview).  
847

## Language vs. ToM Networks in Naturalistic Stimulus Tracking

848 Finally, this work leaves open a number of exciting future directions, some of which may build  
849 directly on the approaches introduced and the findings reported in the current study. First, the  
850 language and ToM networks appear to be dissociable in the adult mind and brain. However, it is  
851 possible—perhaps even plausible—that this dissociation emerges over the course of  
852 development. Prior neuroimaging work has shown that the ToM network becomes gradually  
853 more specialized for mental state attribution (e.g., Saxe, 2009; Gweon et al., 2012; Richardson et  
854 al., 2018), and this specialization appears to be delayed with delayed language acquisition  
855 (Richardson et al., 2020). And very little is known about how specialization for linguistic  
856 processing (e.g., Fedorenko et al., 2011; Monti et al., 2012) emerges. Perhaps early on in  
857 development, a set of lateral frontal, lateral temporal, and midline cortical areas are tuned to *any*  
858 socially relevant information, and these areas later fractionate into those specialized for  
859 processing linguistic signals vs. those for mental state attribution vs. those that support many  
860 other kinds of social signals, from eye gaze, to facial expressions, to body postures, to prosody,  
861 to gestures (e.g., Downing et al., 2006; Deen et al., 2015; Isik et al., 2017; Jouravlev et al., 2019).  
862 This fractionation is likely driven by computational and metabolic advantages of localized  
863 processing (e.g., Barlow, 1995; Foldiak & Young, 1995; Chklovskii & Koulakov, 2004;  
864 Olshausen & Field, 2004; see Kanwisher, 2010, for discussion). Probing linguistic and social  
865 cognition across the lifespan will be critical to understand how the two networks form and  
866 develop, leading to the segregation we observe in the adult brain.

867  
868 Second, as noted above, given the likely frequent interactions between the language and ToM  
869 networks (including their most strongly dissociated components), searching for possible  
870 mechanisms of those interactions (e.g., Paunov et al., 2019) seems critical. This would require a

## Language vs. ToM Networks in Naturalistic Stimulus Tracking

871 combination of studies characterizing the patterns of anatomical connections for the language  
872 and ToM regions (e.g., Saur et al., 2010; Wiesmann et al., 2017) and studies probing online  
873 interactions using methods with high temporal resolution, like MEG or intracranial recordings.

874  
875 And third, we are still a long way away from a mechanistic-level understanding of what the  
876 language or the ToM regions do. The use of naturalistic stimuli, including in the context of the  
877 ISC approach, is promising. In particular, by examining the points in the stimulus where most  
878 participants show increases in neural activity can help generate (and subsequently test) specific  
879 hypotheses about the necessary and sufficient features of the input required to elicit neural  
880 responses in the relevant brain regions.

881  
882 To conclude, we have demonstrated that the dissociation between the language and ToM  
883 networks that has been previously reported based on traditional task paradigms, robustly  
884 generalizes to rich naturalistic conditions. However, the precise nature of each network's  
885 representations and computations, the emergence of these networks from birth to adulthood, and  
886 the mechanisms for information sharing between them remain to be discovered.  
887



## Language vs. ToM Networks in Naturalistic Stimulus Tracking

### 888 **References**

- 889
- 890 Amalric, M., & Dehaene, S. (2018). Cortical circuits for mathematical knowledge: evidence for a  
891 major subdivision within the brain's semantic networks. *Philosophical Transactions of the*  
892 *Royal Society B: Biological Sciences*, 373(1740), 20160515.
- 893 Anderson, A. J., Lalor, E. C., Lin, F., Binder, J. R., Fernandino, L., Humphries, C. J., ... & Wang,  
894 X. (2019). Multiple regions of a cortical network commonly encode the meaning of words in  
895 multiple grammatical positions of read sentences. *Cerebral cortex*, 29(6), 2396-2411.
- 896 Apperly, I. A., Samson, D., Carroll, N., Hussain, S., & Humphreys, G. (2006). Intact first-and  
897 second-order false belief reasoning in a patient with severely impaired grammar. *Social*  
898 *neuroscience*, 1(3-4), 334-348.
- 899 Aronson E. The social animal. New York: Palgrave Macmillan; 1980.
- 900 Ayyash, D., Malik-Moraleda, S., Gallée, J., Affourtit, J., Mineroff, Z., Jouravlev, O., &  
901 Fedorenko, E. (in prep). The universal language network: A cross-linguistic investigation  
902 spanning 45 languages and 11 language families.
- 903 Baayen, R. H., Davidson, D. J., & Bates, D. M. (2008). Mixed-effects modeling with crossed  
904 random effects for subjects and items. *Journal of memory and language*, 59(4), 390-412.
- 905 Barlow, H. (1995). The neuron doctrine in perception.
- 906 Barr, D. J., Levy, R., Scheepers, C., & Tily, H. J. (2013). Random effects structure for  
907 confirmatory hypothesis testing: Keep it maximal. *Journal of memory and language*, 68(3),  
908 255-278.
- 909 Bautista, A., & Wilson, S. M. (2016). Neural responses to grammatically and lexically degraded  
910 speech. *Language, cognition and neuroscience*, 31(4), 567-574.

## Language vs. ToM Networks in Naturalistic Stimulus Tracking

- 911 Beckmann, C. F., DeLuca, M., Devlin, J. T., & Smith, S. M. (2005). Investigations into resting-  
912 state connectivity using independent component analysis. *Philosophical Transactions of the*  
913 *Royal Society B: Biological Sciences*, 360(1457), 1001-1013.
- 914 Bedny, M., Pascual-Leone, A., Dodell-Feder, D., Fedorenko, E., & Saxe, R. (2011). Language  
915 processing in the occipital cortex of congenitally blind adults. *Proceedings of the National*  
916 *Academy of Sciences*, 108(11), 4429-4434.
- 917 Benjamini, Y., & Yekutieli, D. (2001). The control of the false discovery rate in multiple testing  
918 under dependency. *The annals of statistics*, 29(4), 1165-1188.
- 919 Blank, I. A., & Fedorenko, E. (2017). Domain-general brain regions do not track linguistic input  
920 as closely as language-selective regions. *Journal of Neuroscience*, 37(41), 9999-10011.
- 921 Blank, I., Balewski, Z., Mahowald, K., & Fedorenko, E. (2016). Syntactic processing is  
922 distributed across the language system. *Neuroimage*, 127, 307-323.
- 923 Blank, I., Kanwisher, N., & Fedorenko, E. (2014). A functional dissociation between language  
924 and multiple-demand systems revealed in patterns of BOLD signal fluctuations. *Journal of*  
925 *neurophysiology*, 112(5), 1105-1118.
- 926 Bower, G. H., & Morrow, D. G. (1990). Mental models in narrative comprehension. *Science*,  
927 247(4938), 44-48.
- 928 Braga, R. M., DiNicola, L. M., Becker, H. C., & Buckner, R. L. (2020). Situating the left-  
929 lateralized language network in the broader organization of multiple specialized large-scale  
930 distributed networks. *Journal of neurophysiology*, 124(5), 1415-1448.
- 931 Brett, M., Johnsrude, I. S., & Owen, A. M. (2002). The problem of functional localization in the  
932 human brain. *Nature reviews neuroscience*, 3(3), 243.

## Language vs. ToM Networks in Naturalistic Stimulus Tracking

- 933 Bruneau, E. G., Pluta, A., & Saxe, R. (2012). Distinct roles of the ‘shared pain’ and ‘theory of  
934 mind’ networks in processing others’ emotional suffering. *Neuropsychologia*, *50*(2), 219-231.
- 935 Callaghan, T., Rochat, P., Lillard, A., Claux, M. L., Odden, H., Itakura, S., ... & Singh, S. (2005).  
936 Synchrony in the onset of mental-state reasoning: Evidence from five cultures. *Psychological  
937 Science*, *16*(5), 378-384.
- 938 Castelli, F., Happé, F., Frith, U., & Frith, C. (2000). Movement and mind: a functional imaging  
939 study of perception and interpretation of complex intentional movement  
940 patterns. *Neuroimage*, *12*(3), 314-325.
- 941 Chen, G., Taylor, P. A., & Cox, R. W. (2017). Is the statistic value all we should care about in  
942 neuroimaging?. *Neuroimage*, *147*, 952-959.
- 943 Cheney, D., & Seyfarth, R. (1990). Attending to behaviour versus attending to knowledge:  
944 Examining monkeys' attribution of mental states. *Animal Behaviour*, *40*(4), 742-753.
- 945 Chklovskii, D. B., & Koulakov, A. A. (2004). Maps in the brain: what can we learn from  
946 them?. *Annu. Rev. Neurosci.*, *27*, 369-392.
- 947 Cordes, D., Haughton, V. M., Arfanakis, K., Carew, J. D., Turski, P. A., Moritz, C. H., ... &  
948 Meyerand, M. E. (2001). Frequencies contributing to functional connectivity in the cerebral  
949 cortex in “resting-state” data. *American Journal of Neuroradiology*, *22*(7), 1326-1333.
- 950 Cuevas, P., Steines, M., He, Y., Nagels, A., Culham, J., & Straube, B. (2019). The facilitative  
951 effect of gestures on the neural processing of semantic complexity in a continuous  
952 narrative. *NeuroImage*, *195*, 38-47.
- 953 Deen, B., Koldewyn, K., Kanwisher, N., & Saxe, R. (2015). Functional organization of social  
954 perception and cognition in the superior temporal sulcus. *Cerebral Cortex*, bhv111.

## Language vs. ToM Networks in Naturalistic Stimulus Tracking

- 955 Diachek, E., Blank, I., Siegelman, M., Affourtit, J., & Fedorenko, E. (2020). The domain-general  
956 multiple demand (MD) network does not support core aspects of language comprehension: a  
957 large-scale fMRI investigation. *Journal of Neuroscience*, *40*(23), 4536-4550.
- 958 Downing, P. E., Peelen, M. V., Wiggett, A. J., & Tew, B. D. (2006). The role of the extrastriate  
959 body area in action perception. *Social Neuroscience*, *1*(1), 52-62.
- 960 Dufour, N., Redcay, E., Young, L., Mavros, P. L., Moran, J. M., Triantafyllou, C., ... & Saxe, R.  
961 (2013). Similar brain activation during false belief tasks in a large sample of adults with and  
962 without autism. *PloS one*, *8*(9), e75468.
- 963 Dunbar, R. I. (2004). Gossip in evolutionary perspective. *Review of general psychology*, *8*(2),  
964 100-110.
- 965 Dunbar, R. I., Marriott, A., & Duncan, N. D. (1997). Human conversational behavior. *Human*  
966 *nature*, *8*(3), 231-246.
- 967 Duncan, J. (2010). The multiple-demand (MD) system of the primate brain: mental programs for  
968 intelligent behaviour. *Trends in cognitive sciences*, *14*(4), 172-179.
- 969 Duncan, J. (2013). The structure of cognition: attentional episodes in mind and brain. *Neuron*,  
970 *80*(1), 35-50.
- 971 Fedorenko, E. (2021). The early origins and the growing popularity of the individual-subject  
972 analytic approach in human neuroscience. *Current Opinion in Behavioral Sciences*, *40*, 105-  
973 112.
- 974 Fedorenko, E. (2014). The role of domain-general cognitive control in language comprehension.  
975 *Frontiers in psychology*, *5*, 335.

## Language vs. ToM Networks in Naturalistic Stimulus Tracking

- 976 Fedorenko, E., Behr, M. K., & Kanwisher, N. (2011). Functional specificity for high-level  
977 linguistic processing in the human brain. *Proceedings of the National Academy of Sciences*,  
978 *108*(39), 16428-16433.
- 979 Fedorenko, E., Blank, I. A., Siegelman, M., & Mineroff, Z. (2020). Lack of selectivity for syntax  
980 relative to word meanings throughout the language network. *Cognition*, *203*, 104348.
- 981 Fedorenko, E., Duncan, J., & Kanwisher, N. (2013). Broad domain generality in focal regions of  
982 frontal and parietal cortex. *Proceedings of the National Academy of Sciences*, *110*(41), 16616-  
983 16621.
- 984 Fedorenko, E., Hsieh, P. J., Nieto-Castañón, A., Whitfield-Gabrieli, S., & Kanwisher, N. (2010).  
985 New method for fMRI investigations of language: defining ROIs functionally in individual  
986 subjects. *Journal of neurophysiology*, *104*(2), 1177-1194.
- 987 Fedorenko, E., & Kanwisher, N. (2009). Neuroimaging of language: why hasn't a clearer picture  
988 emerged?. *Language and Linguistics Compass*, *3*(4), 839-865.
- 989 Fedorenko, E., Mineroff, Z., Siegelman, M., & Blank, I. (2017). The distinction between lexico-  
990 semantic and syntactic processing is not an organizing dimension of the human language  
991 system. In *30th CUNY Conference on Human Sentence Processing, Cambridge, MA*.
- 992 Fedorenko, E., Nieto-Castanon, A., & Kanwisher, N. (2012b). Lexical and syntactic  
993 representations in the brain: an fMRI investigation with multi-voxel pattern analyses.  
994 *Neuropsychologia*, *50*(4), 499-513.
- 995 Fedorenko, E., Scott, T. L., Brunner, P., Coon, W. G., Pritchett, B., Schalk, G., & Kanwisher, N.  
996 (2016). Neural correlate of the construction of sentence meaning. *Proceedings of the National*  
997 *Academy of Sciences*, *113*(41), E6256-E6262.

## Language vs. ToM Networks in Naturalistic Stimulus Tracking

- 998 Fedorenko & Shain (under review). Local implementation of general computations: The case of  
999 human language comprehension.
- 1000 Fedorenko, E., & Thompson-Schill, S. L. (2014). Reworking the language network. *Trends in*  
1001 *cognitive sciences*, 18(3), 120-126.
- 1002 Fedorenko, E., & Varley, R. (2016). Language and thought are not the same thing: evidence  
1003 from neuroimaging and neurological patients. *Annals of the New York Academy of*  
1004 *Sciences*, 1369(1), 132.
- 1005 Finlayson, M. A., & Winston, P. H. (2011). Narrative is a Key Cognitive Competency. In *BICA*  
1006 (p. 110).
- 1007 Fischl, B., Rajendran, N., Busa, E., Augustinack, J., Hinds, O., Yeo, B. T., ... & Zilles, K. (2007).  
1008 Cortical folding patterns and predicting cytoarchitecture. *Cerebral cortex*, 18(8), 1973-1980.
- 1009 Fletcher, P. C., Happe, F., Frith, U., Baker, S. C., Dolan, R. J., Frackowiak, R. S., & Frith, C. D.  
1010 (1995). Other minds in the brain: a functional imaging study of “theory of mind” in story  
1011 comprehension. *Cognition*, 57(2), 109-128.
- 1012 Fodor, J. A. (1983). *The modularity of mind*. MIT press.
- 1013 Foldiak, P., & Young, M. (1995). Sparse coding in the primate cortex. *The Handbook of Brain*  
1014 *Theory and Neural Networks*, 895-898.
- 1015 Frith, U., & Happé, F. (1994). Autism: beyond “theory of mind”. *Cognition*, 50(1), 115-132.  
1016 from neuroimaging and neurological patients. *Annals of the New York Academy of*  
1017 *Sciences*, 1369(1), 132-153.
- 1018 Frost, M. A., & Goebel, R. (2012). Measuring structural–functional correspondence: spatial  
1019 variability of specialised brain regions after macro-anatomical alignment. *Neuroimage*, 59(2),  
1020 1369-1381.

## Language vs. ToM Networks in Naturalistic Stimulus Tracking

- 1021 Frost, M. A., & Goebel, R. (2012). Measuring structural–functional correspondence: spatial  
1022 variability of specialised brain regions after macro-anatomical alignment. *Neuroimage*, *59*(2),  
1023 1369-1381.
- 1024 Futrell, R., Gibson, E., Tily, H., Blank, I., Vishnevetsky, A., Piantadosi, S. T., & Fedorenko, E.  
1025 (2017). The natural stories corpus. *arXiv preprint arXiv:1708.05763*.
- 1026 Gallagher, H. L., Happé, F., Brunswick, N., Fletcher, P. C., Frith, U., & Frith, C. D. (2000).  
1027 Reading the mind in cartoons and stories: an fMRI study of ‘theory of mind’ in verbal and  
1028 nonverbal tasks. *Neuropsychologia*, *38*(1), 11-21.
- 1029 Gallivan, J. P., Cavina-Pratesi, C., & Culham, J. C. (2009). Is that within reach? fMRI reveals  
1030 that the human superior parieto-occipital cortex encodes objects reachable by the  
1031 hand. *Journal of Neuroscience*, *29*(14), 4381-4391.
- 1032 Grice, H. P. (1968). Utterer’s meaning, sentence-meaning, and word-meaning. In *Philosophy,*  
1033 *Language, and Artificial Intelligence* (pp. 49-66). Springer, Dordrecht.
- 1034 Grice, H. P., Cole, P., & Morgan, J. (1975). Logic and conversation. *1975*, 41-58.
- 1035 Gweon, H., Dodell-Feder, D., Bedny, M., & Saxe, R. (2012). Theory of mind performance in  
1036 children correlates with functional specialization of a brain region for thinking about thoughts.  
1037 *Child development*, *83*(6), 1853-1868.
- 1038 Hasson, U., Egidi, G., Marelli, M., & Willems, R. M. (2018). Grounding the neurobiology of  
1039 language in first principles: The necessity of non-language-centric explanations for language  
1040 comprehension. *Cognition*, *180*, 135-157.
- 1041 Hasson, U., Furman, O., Clark, D., Dudai, Y., & Davachi, L. (2008). Enhanced intersubject  
1042 correlations during movie viewing correlate with successful episodic encoding. *Neuron*, *57*(3),  
1043 452-462.

## Language vs. ToM Networks in Naturalistic Stimulus Tracking

- 1044 Hasson, U., Malach, R., & Heeger, D. J. (2010). Reliability of cortical activity during natural  
1045 stimulation. *Trends in cognitive sciences*, *14*(1), 40-48.
- 1046 Hasson, U., Nir, Y., Levy, I., Fuhrmann, G., & Malach, R. (2004). Intersubject synchronization  
1047 of cortical activity during natural vision. *science*, *303*(5664), 1634-1640.
- 1048 HBO (Producer). (2003, December 7). Chapter 1: Bad News [Audio only]. *Angels in America*.  
1049 Retrieved from <https://www.imdb.com/title/tt0318997/>
- 1050 Heider, F., & Simmel, M. (1944). An experimental study of apparent behavior. *The American*  
1051 *journal of psychology*, *57*(2), 243-259.
- 1052 Honey, C. J., Thompson, C. R., Lerner, Y., & Hasson, U. (2012). Not lost in translation: neural  
1053 responses shared across languages. *Journal of Neuroscience*, *32*(44), 15277-15283.
- 1054 Isik, L., Koldewyn, K., Beeler, D., & Kanwisher, N. (2017). Perceiving social interactions in the  
1055 posterior superior temporal sulcus. *Proceedings of the National Academy of*  
1056 *Sciences*, *114*(43), E9145-E9152.
- 1057 Ivanova, A. A., Mineroff, Z., Zimmerer, V., Kanwisher, N., Varley, R., & Fedorenko, E. (2021).  
1058 The language network is recruited but not required for nonverbal event  
1059 semantics. *Neurobiology of Language*, *2*(2), 176-201.
- 1060 Ivanova, A. A., Siegelman, M., Cheung, C., Pongos, A. L. A., Kean, H. H., & Fedorenko, E. (in  
1061 prep). The effect of task on sentence processing in the brain.
- 1062 Ivanova, A. A., Srikant, S., Sueoka, Y., Kean, H. H., Dhamala, R., O'reilly, U. M., ... &  
1063 Fedorenko, E. (2020). Comprehension of computer code relies primarily on domain-general  
1064 executive brain regions. *Elife*, *9*, e58906.



## Language vs. ToM Networks in Naturalistic Stimulus Tracking

- 1065 Jacoby, N., & Fedorenko, E. (2020). Discourse-level comprehension engages medial frontal  
1066 Theory of Mind brain regions even for expository texts. *Language, Cognition and*  
1067 *Neuroscience*, 35(6), 780-796.
- 1068 Jacoby, N., Bruneau, E., Koster-Hale, J., & Saxe, R. (2016). Localizing Pain Matrix and Theory  
1069 of Mind networks with both verbal and non-verbal stimuli. *Neuroimage*, 126, 39-48.
- 1070 Jouravlev, O., Zheng, D., Balewski, Z., Pongos, A. L. A., Levan, Z., Goldin-Meadow, S., &  
1071 Fedorenko, E. (2019). Speech-accompanying gestures are not processed by the language-  
1072 processing mechanisms. *Neuropsychologia*, 107132.
- 1073 Julian, J. B., Fedorenko, E., Webster, J., & Kanwisher, N. (2012). An algorithmic method for  
1074 functionally defining regions of interest in the ventral visual pathway. *Neuroimage*, 60(4),  
1075 2357-2364.
- 1076 Kanwisher, N. (2010). Functional specificity in the human brain: a window into the functional  
1077 architecture of the mind. *Proceedings of the National Academy of Sciences*, 107(25), 11163-  
1078 11170.
- 1079 Keller, G. B., & Mrcic-Flogel, T. D. (2018). Predictive processing: a canonical cortical  
1080 computation. *Neuron*, 100(2), 424-435.
- 1081 Koster-Hale, J., & Saxe, R. (2013). Functional neuroimaging of theory of mind. *Understanding*  
1082 *other minds: Perspectives from developmental social neuroscience*, 132-163.
- 1083 Koster-Hale, J., Bedny, M., & Saxe, R. (2014). Thinking about seeing: Perceptual sources of  
1084 knowledge are encoded in the theory of mind brain regions of sighted and blind  
1085 adults. *Cognition*, 133(1), 65-78.

## Language vs. ToM Networks in Naturalistic Stimulus Tracking

- 1086 Lerner, Y., Epshtein, B., Ullman, S., & Malach, R. (2008). Class information predicts activation  
1087 by object fragments in human object areas. *Journal of Cognitive Neuroscience*, 20(7), 1189-  
1088 1206.
- 1089 Lerner, Y., Honey, C. J., Silbert, L. J., & Hasson, U. (2011). Topographic mapping of a  
1090 hierarchy of temporal receptive windows using a narrated story. *Journal of*  
1091 *Neuroscience*, 31(8), 2906-2915.
- 1092 Mar, R. A. (2011). The neural bases of social cognition and story comprehension. *Annual review*  
1093 *of psychology*, 62, 103-134.
- 1094 Mason, R. A., & Just, M. A. (2009). The role of the theory of mind cortical network in the  
1095 comprehension of narratives. *Language and Linguistics Compass*, 3(1), 157-174.
- 1096 Mellem, M. S., Jasmin, K. M., Peng, C., & Martin, A. (2016). Sentence processing in anterior  
1097 superior temporal cortex shows a social-emotional bias. *Neuropsychologia*, 89, 217-224.
- 1098 Monti, M. M., Parsons, L. M., & Osherson, D. N. (2012). Thought beyond language neural  
1099 dissociation of algebra and natural language. *Psychological Science*, 0956797612437427.
- 1100 Morosan, P., Rademacher, J., Schleicher, A., Amunts, K., Schormann, T., & Zilles, K. (2001).  
1101 Human primary auditory cortex: cytoarchitectonic subdivisions and mapping into a spatial  
1102 reference system. *Neuroimage*, 13(4), 684-701.
- 1103 Mr Bean. (2009, Aug 25). *Falling Asleep in Church | Funny Clip | Mr Bean Official* [Video file].  
1104 Retrieved from [https://www.youtube.com/watch?v=bh\\_g-ZZ6WA](https://www.youtube.com/watch?v=bh_g-ZZ6WA)
- 1105 Nastase, S. A., Goldstein, A., & Hasson, U. (2020). Keep it real: rethinking the primacy of  
1106 experimental control in cognitive neuroscience. *NeuroImage*, 222, 117254.
- 1107 Nieto-Castañón, A., & Fedorenko, E. (2012). Subject-specific functional localizers increase  
1108 sensitivity and functional resolution of multi-subject analyses. *Neuroimage*, 63(3), 1646-1669.

## Language vs. ToM Networks in Naturalistic Stimulus Tracking

- 1109 Nieuwenhuis, S., Forstmann, B. U., & Wagenmakers, E. J. (2011). Erroneous analyses of  
1110 interactions in neuroscience: a problem of significance. *Nature neuroscience*, *14*(9), 1105.
- 1111 Norman-Haignere, S., Kanwisher, N. G., & McDermott, J. H. (2015). Distinct cortical pathways  
1112 for music and speech revealed by hypothesis-free voxel decomposition. *Neuron*, *88*(6), 1281-  
1113 1296.
- 1114 Nowak, M. A., & Sigmund, K. (2005). Evolution of indirect reciprocity. *Nature*, *437*(7063),  
1115 1291.
- 1116 Nowak, M., & Highfield, R. (2011). *Supercooperators: Altruism, evolution, and why we need*  
1117 *each other to succeed*. Simon and Schuster.
- 1118 Oldfield, R. C. (1971). The assessment and analysis of handedness: the Edinburgh inventory.  
1119 *Neuropsychologia*, *9*(1), 97-113.
- 1120 Olshausen, B. A., & Field, D. J. (2004). Sparse coding of sensory inputs. *Current opinion in*  
1121 *neurobiology*, *14*(4), 481-487.
- 1122 Paunov A.M., Shain, C., Chen, J., Affourtit, J. & Fedorenko, E. (in prep). Spatial overlap  
1123 between language and Theory of Mind networks with verbal but not with non-verbal tasks:  
1124 fMRI evidence for dissociability.
- 1125 Paunov, A. M., Blank, I. A., & Fedorenko, E. (2019). Functionally distinct language and Theory  
1126 of Mind networks are synchronized at rest and during language comprehension. *Journal of*  
1127 *neurophysiology*, *121*(4), 1244-1265.
- 1128 Paunov, A.M. (2019). fMRI studies of the relationship between language and theory of mind in  
1129 adult cognition. PhD Dissertation. Massachusetts Institute of Technology. Cambridge, MA,  
1130 USA.

## Language vs. ToM Networks in Naturalistic Stimulus Tracking

- 1131 Piantadosi, S. T., Tily, H., & Gibson, E. (2011). Word lengths are optimized for efficient  
1132 communication. *Proceedings of the National Academy of Sciences*, *108*(9), 3526-3529.
- 1133 Poldrack, R. A. (2006). Can cognitive processes be inferred from neuroimaging data?. *Trends in*  
1134 *cognitive sciences*, *10*(2), 59-63.
- 1135 Poldrack, R. A., Baker, C. I., Durnez, J., Gorgolewski, K. J., Matthews, P. M., Munafò, M. R., ...  
1136 & Yarkoni, T. (2017). Scanning the horizon: towards transparent and reproducible  
1137 neuroimaging research. *Nature Reviews Neuroscience*, *18*(2), 115.
- 1138 Pritchett, B. L., Hoeflin, C., Koldewyn, K., Dechter, E., & Fedorenko, E. (2018). High-level  
1139 language processing regions are not engaged in action observation or imitation. *Journal of*  
1140 *neurophysiology*, *120*(5), 2555-2570.
- 1141 Redcay, E., Velnoskey, K. R., & Rowe, M. L. (2016). Perceived communicative intent in gesture  
1142 and language modulates the superior temporal sulcus. *Human brain mapping*, *37*(10), 3444-  
1143 3461.
- 1144 Reddy, A. J., & Wehbe, L. (2020). Syntactic representations in the human brain: beyond effort-  
1145 based metrics. *bioRxiv*.
- 1146 Regev, M., Honey, C. J., Simony, E., & Hasson, U. (2013). Selective and invariant neural  
1147 responses to spoken and written narratives. *Journal of Neuroscience*, *33*(40), 15978-15988.
- 1148 Richardson, H., Koster-Hale, J., Caselli, N., Magid, R., Benedict, R., Olson, H., ... & Saxe, R.  
1149 (2020). Reduced neural selectivity for mental states in deaf children with delayed exposure to  
1150 sign language. *Nature communications*, *11*(1), 1-13.
- 1151 Richardson, H., Lisandrelli, G., Riobueno-Naylor, A., & Saxe, R. (2018). Development of the  
1152 social brain from age three to twelve years. *Nature communications*, *9*(1), 1-12.

## Language vs. ToM Networks in Naturalistic Stimulus Tracking

- 1153 Sabbagh, M. A., Xu, F., Carlson, S. M., Moses, L. J., & Lee, K. (2006). The development of  
1154 executive functioning and theory of mind: A comparison of Chinese and US  
1155 preschoolers. *Psychological science*, *17*(1), 74-81.
- 1156 Saur, D., Schelter, B., Schnell, S., Kratochvil, D., Küpper, H., Kellmeyer, P., ... & Mader, W.  
1157 (2010). Combining functional and anatomical connectivity reveals brain networks for auditory  
1158 language comprehension. *Neuroimage*, *49*(4), 3187-3197.??
- 1159 Saxe, R. R., Whitfield-Gabrieli, S., Scholz, J., & Pelphrey, K. A. (2009). Brain regions for  
1160 perceiving and reasoning about other people in school-aged children. *Child*  
1161 *development*, *80*(4), 1197-1209.
- 1162 Saxe, R., & Kanwisher, N. (2003). People thinking about thinking people: the role of the  
1163 temporo-parietal junction in “theory of mind”. *Neuroimage*, *19*(4), 1835-1842.
- 1164 Saxe, R., & Powell, L. J. (2006). It's the thought that counts: specific brain regions for one  
1165 component of theory of mind. *Psychological science*, *17*(8), 692-699.
- 1166 Saxe, R., Brett, M., & Kanwisher, N. (2006). Divide and conquer: a defense of functional  
1167 localizers. *Neuroimage*, *30*(4), 1088-1096.
- 1168 Saxe, R., Schulz, L. E., & Jiang, Y. V. (2006). Reading minds versus following rules:  
1169 Dissociating theory of mind and executive control in the brain. *Social neuroscience*, *1*(3-4),  
1170 284-298.
- 1171 Schmäzle, R., Häcker, F. E., Honey, C. J., & Hasson, U. (2015). Engaged listeners: shared  
1172 neural processing of powerful political speeches. *Social cognitive and affective*  
1173 *neuroscience*, *10*(8), 1137-1143.
- 1174 Scott, T. L., Gallée, J., & Fedorenko, E. (2017). A new fun and robust version of an fMRI  
1175 localizer for the frontotemporal language system. *Cognitive neuroscience*, *8*(3), 167-176.

## Language vs. ToM Networks in Naturalistic Stimulus Tracking

- 1176 Shahaieian, A., Peterson, C. C., Slaughter, V., & Wellman, H. M. (2011). Culture and the  
1177 sequence of steps in theory of mind development. *Developmental psychology*, *47*(5), 1239.
- 1178 Shain, C., Blank, I., Van Shijndel, M., Schuler, W. & Fedorenko, E. (2020). fMRI reveals  
1179 language-specific predictive coding during naturalistic sentence comprehension.  
1180 *Neuropsychologia*, *138*, 107307.
- 1181 Silbert, L. J., Honey, C. J., Simony, E., Poeppel, D., & Hasson, U. (2014). Coupled neural  
1182 systems underlie the production and comprehension of naturalistic narrative  
1183 speech. *Proceedings of the National Academy of Sciences*, *111*(43), E4687-E4696.
- 1184 Silver, N. C., & Dunlap, W. P. (1987). Averaging correlation coefficients: should Fisher's z  
1185 transformation be used?. *Journal of Applied Psychology*, *72*(1), 146.
- 1186 Simon, H. A. (1991). The architecture of complexity. In *Facets of systems science* (pp. 457-476).  
1187 Springer, Boston, MA.
- 1188 Smith, E. A. (2010). Communication and collective action: language and the evolution of human  
1189 cooperation. *Evolution and human behavior*, *31*(4), 231-245.
- 1190 Sommerfeld, R. D., Krambeck, H. J., & Milinski, M. (2008). Multiple gossip statements and  
1191 their effect on reputation and trustworthiness. *Proceedings of the Royal Society B: Biological*  
1192 *Sciences*, *275*(1650), 2529-2536.
- 1193 Sonkusare, S., Breakspear, M., & Guo, C. (2019). Naturalistic stimuli in neuroscience: critically  
1194 acclaimed. *Trends in cognitive sciences*, *23*(8), 699-714.
- 1195 Sperber, D., & Wilson, D. (1986). *Relevance: Communication and cognition* (Vol. 142).  
1196 Cambridge, MA: Harvard University Press.
- 1197 Tager-Flusberg, H., Paul, R., & Lord, C. (2005). *Handbook of autism and pervasive*  
1198 *developmental disorders, Vol. 1: Diagnosis, development, neurobiology, and behavior.*

## Language vs. ToM Networks in Naturalistic Stimulus Tracking

- 1199 Tager-Flusberg, H., Paul, R., Lord, C., Volkmar, F., Paul, R., & Klin, A. (2005). Language and  
1200 communication in autism. *Handbook of autism and pervasive developmental disorders, 1*,  
1201 335-364. –
- 1202 Tahmasebi, A. M., Davis, M. H., Wild, C. J., Rodd, J. M., Hakyemez, H., Abolmaesumi, P., &  
1203 Johnsrude, I. S. (2011). Is the link between anatomical structure and function equally strong at  
1204 all cognitive levels of processing?. *Cerebral Cortex, 22*(7), 1593-1603.
- 1205 Theiler, J., Eubank, S., Longtin, A., Galdrikian, B., & Farmer, J. D. (1992). Testing for  
1206 nonlinearity in time series: the method of surrogate data. *Physica D: Nonlinear Phenomena*,  
1207 58(1-4), 77-94.
- 1208 Tomasello, M. (2014). The ultra-social animal. *European journal of social psychology, 44*(3),  
1209 187-194.
- 1210 Tzourio-Mazoyer N, Landeau B, Papathanassiou D, Crivello F, Etard O, Delcroix N, Mazoyer B,  
1211 Joliot M (2002) Automated anatomical labeling of activations in SPM using a macroscopic  
1212 anatomical parcellation of the MNI MRI single-subject brain. *Neuroimage 15*:273–289.
- 1213 Varley, R., & Siegal, M. (2000). Evidence for cognition without grammar from causal reasoning  
1214 and ‘theory of mind’ in an agrammatic aphasic patient. *Current Biology, 10*(12), 723-726.
- 1215 Varley, R., Siegal, M., & Want, S. C. (2001). Severe impairment in grammar does not preclude  
1216 theory of mind. *Neurocase, 7*(6), 489-493.
- 1217 Wehbe, L., Blank, I., Shain, C., Futrell, R., Levy, R., Malsburg, T. Smith, N., Gibson, E.,  
1218 Fedorenko, E. (in press). Incremental language comprehension difficulty predicts activity in  
1219 the language network but not the multiple demand network. *Cerebral Cortex*.
- 1220 Willems, R. M., Nastase, S. A., & Milivojevic, B. (2020). Narratives for neuroscience. *Trends in*  
1221 *neurosciences, 43*(5), 271-273.

## Language vs. ToM Networks in Naturalistic Stimulus Tracking

- 1222 Whitfield-Gabrieli, S., & Nieto-Castanon, A. (2012). Conn: a functional connectivity toolbox for  
1223 correlated and anticorrelated brain networks. *Brain connectivity*, 2(3), 125-141.
- 1224 Wiesmann, C. G., Schreiber, J., Singer, T., Steinbeis, N., & Friederici, A. D. (2017). White  
1225 matter maturation is associated with the emergence of Theory of Mind in early  
1226 childhood. *Nature communications*, 8, 14692.
- 1227 Wilkinson, K. M. (1998). Profiles of language and communication skills in autism. *Mental*  
1228 *Retardation and Developmental Disabilities Research Reviews*, 4(2), 73-79.
- 1229 Willems, R. M., Benn, Y., Hagoort, P., Toni, I., & Varley, R. (2011). Communicating without a  
1230 functioning language system: implications for the role of language in  
1231 mentalizing. *Neuropsychologia*, 49(11), 3130-3135.
- 1232 Willems, R. M., Van der Haegen, L., Fisher, S. E., & Francks, C. (2014). On the other hand:  
1233 including left-handers in cognitive neuroscience and neurogenetics. *Nature Reviews*  
1234 *Neuroscience*, 15(3), 193.
- 1235 Wilson, S. M., Molnar-Szakacs, I., & Iacoboni, M. (2007). Beyond superior temporal cortex:  
1236 intersubject correlations in narrative speech comprehension. *Cerebral cortex*, 18(1), 230-242.
- 1237 Wimmer, H., & Perner, J. (1983). Beliefs about beliefs: Representation and constraining function  
1238 of wrong beliefs in young children's understanding of deception. *Cognition*, 13(1), 103-128.



# Language

## Sentences

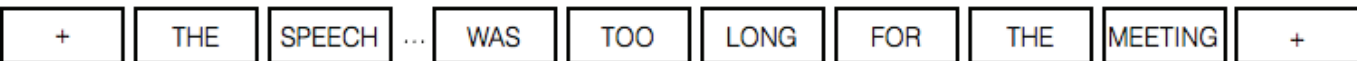

## Non-words

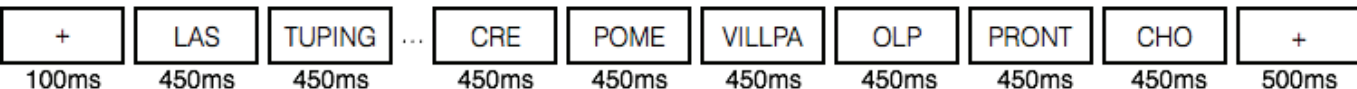

# Theory of Mind

## False Belief

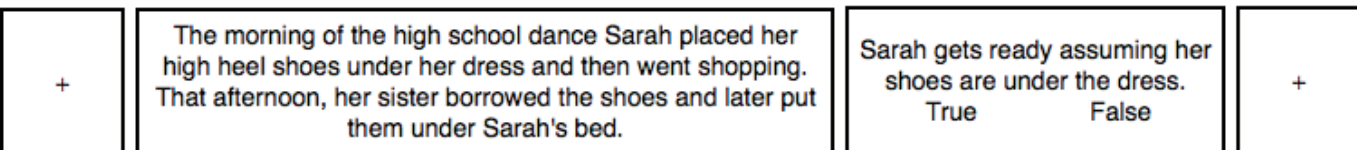

## False Physical

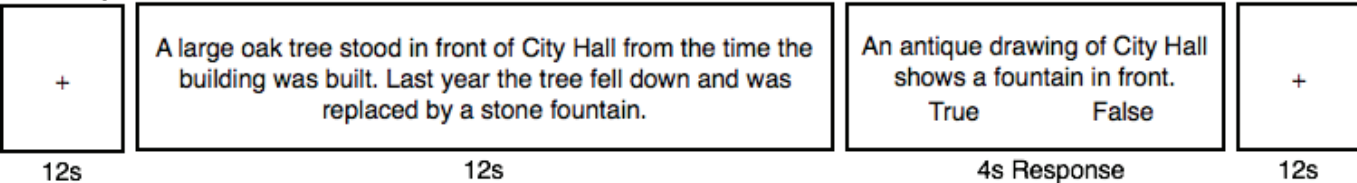

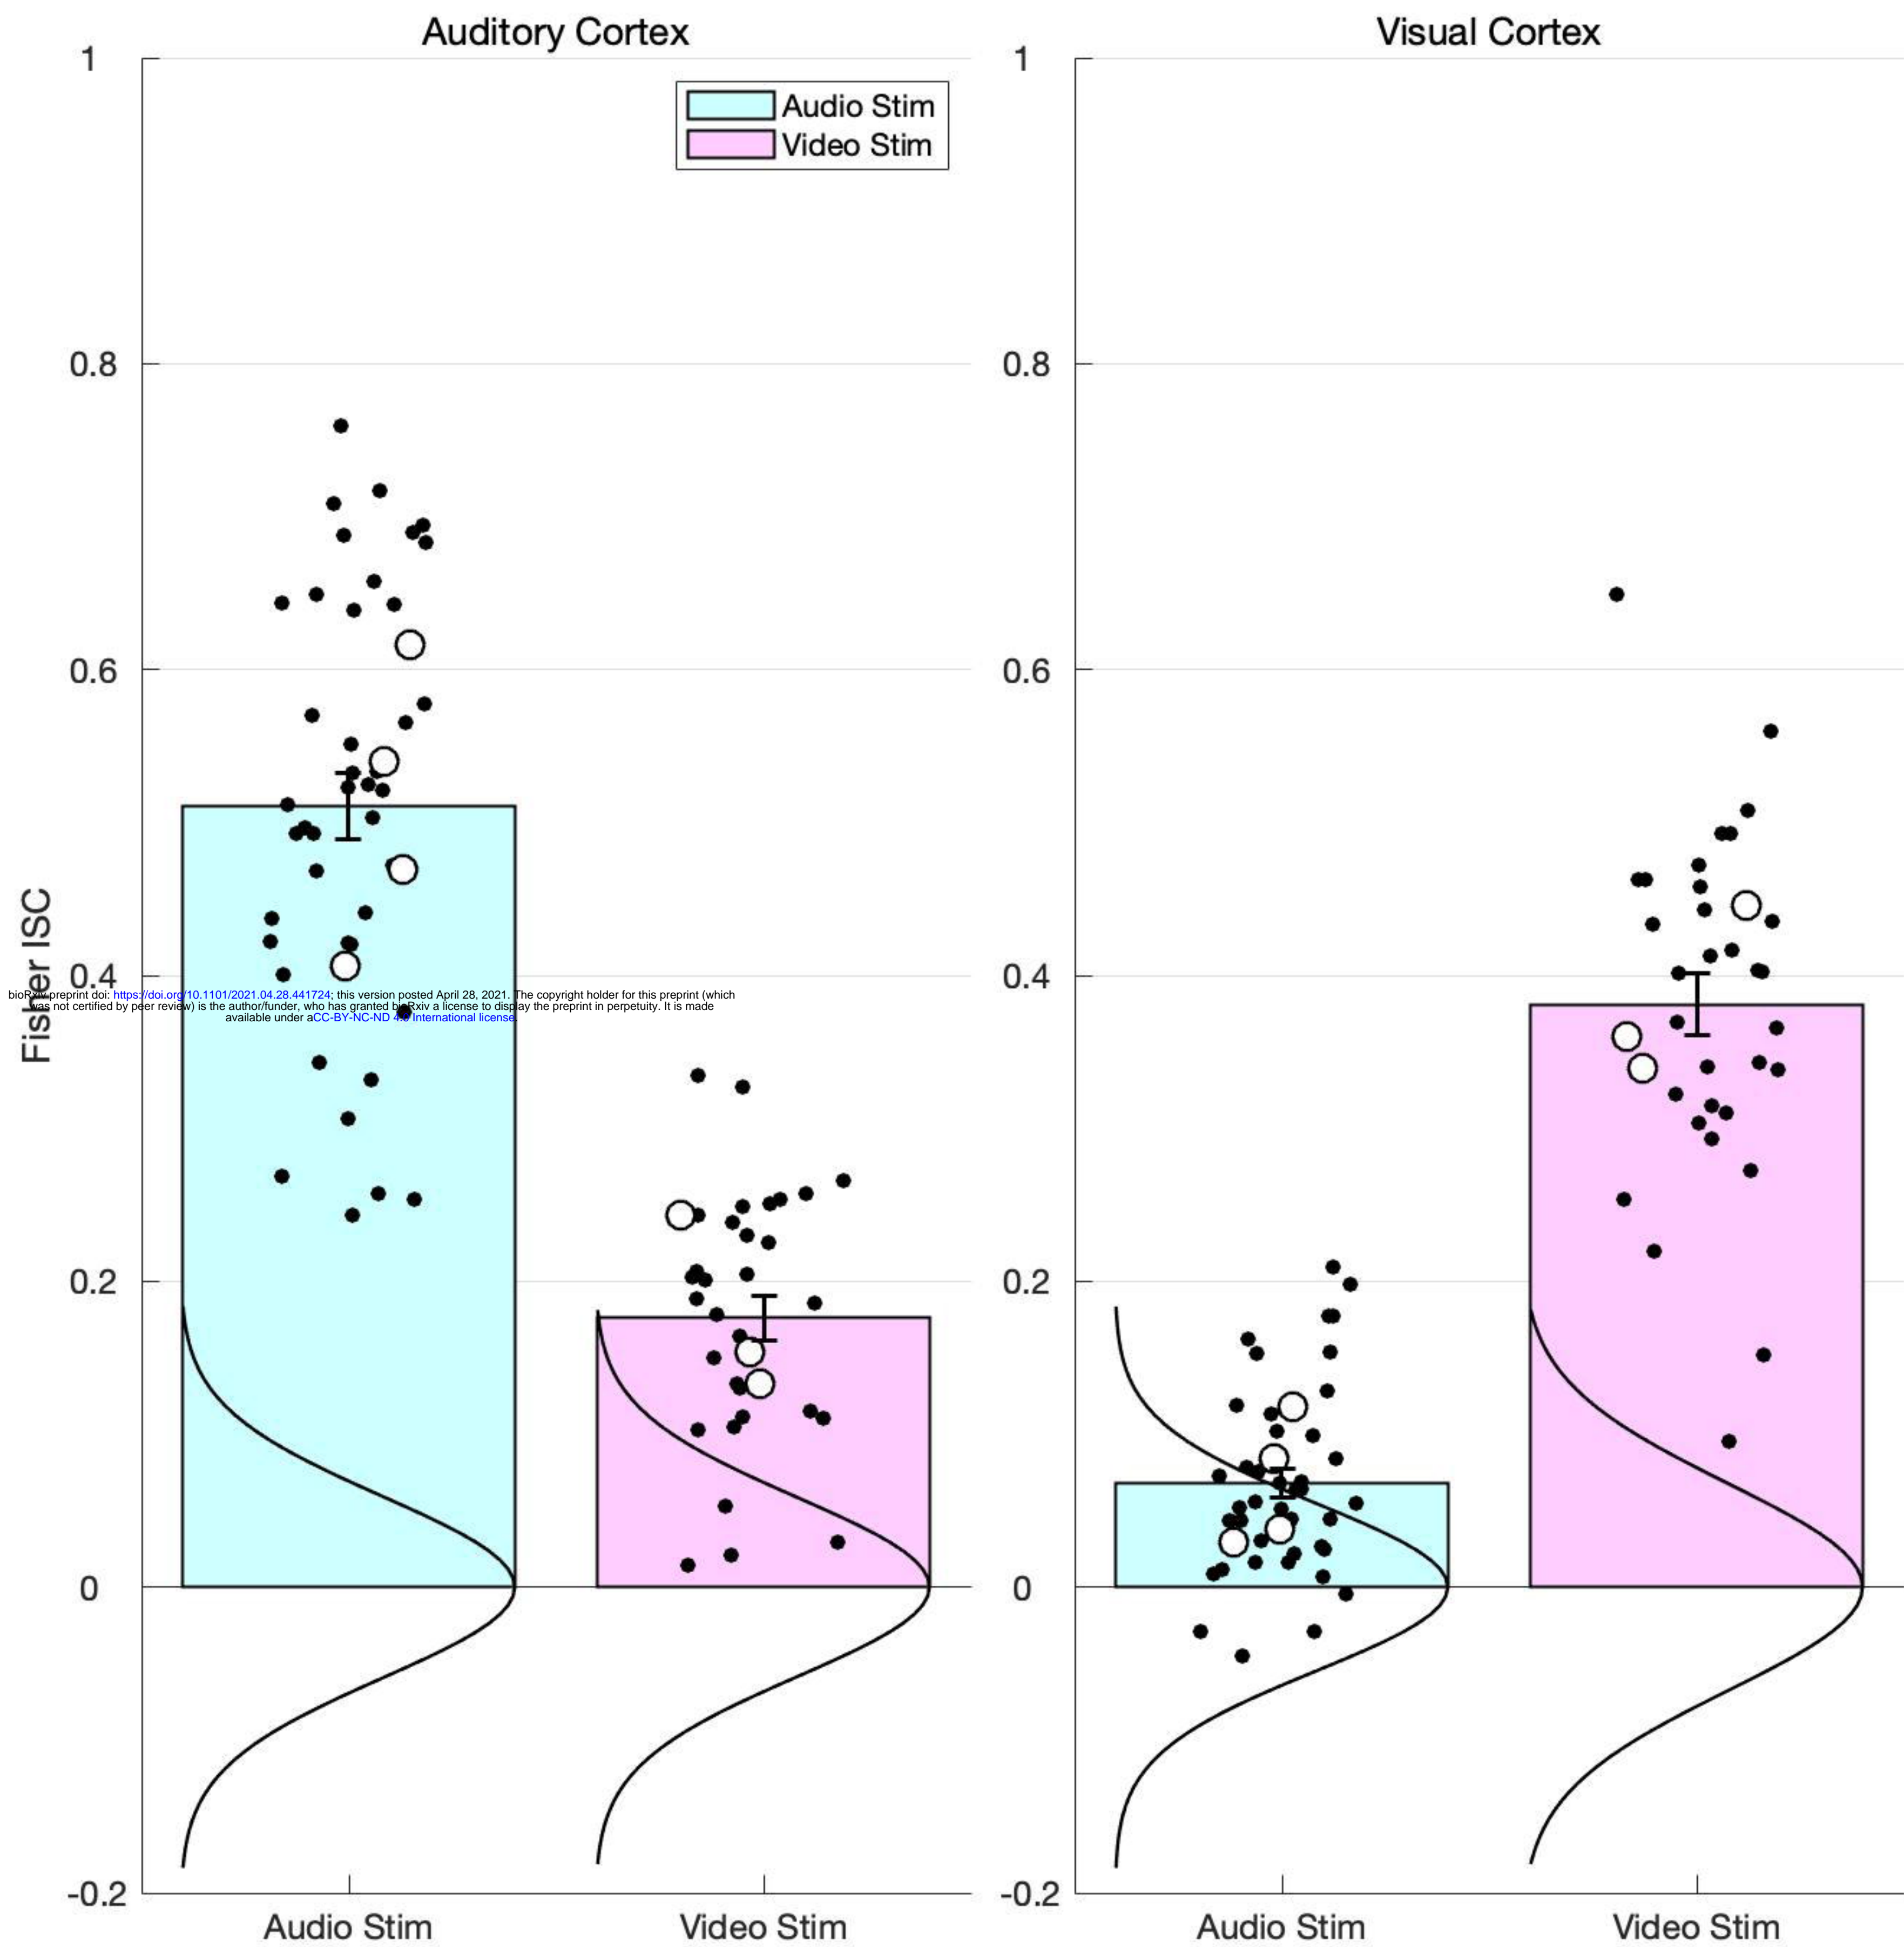

### Language masks

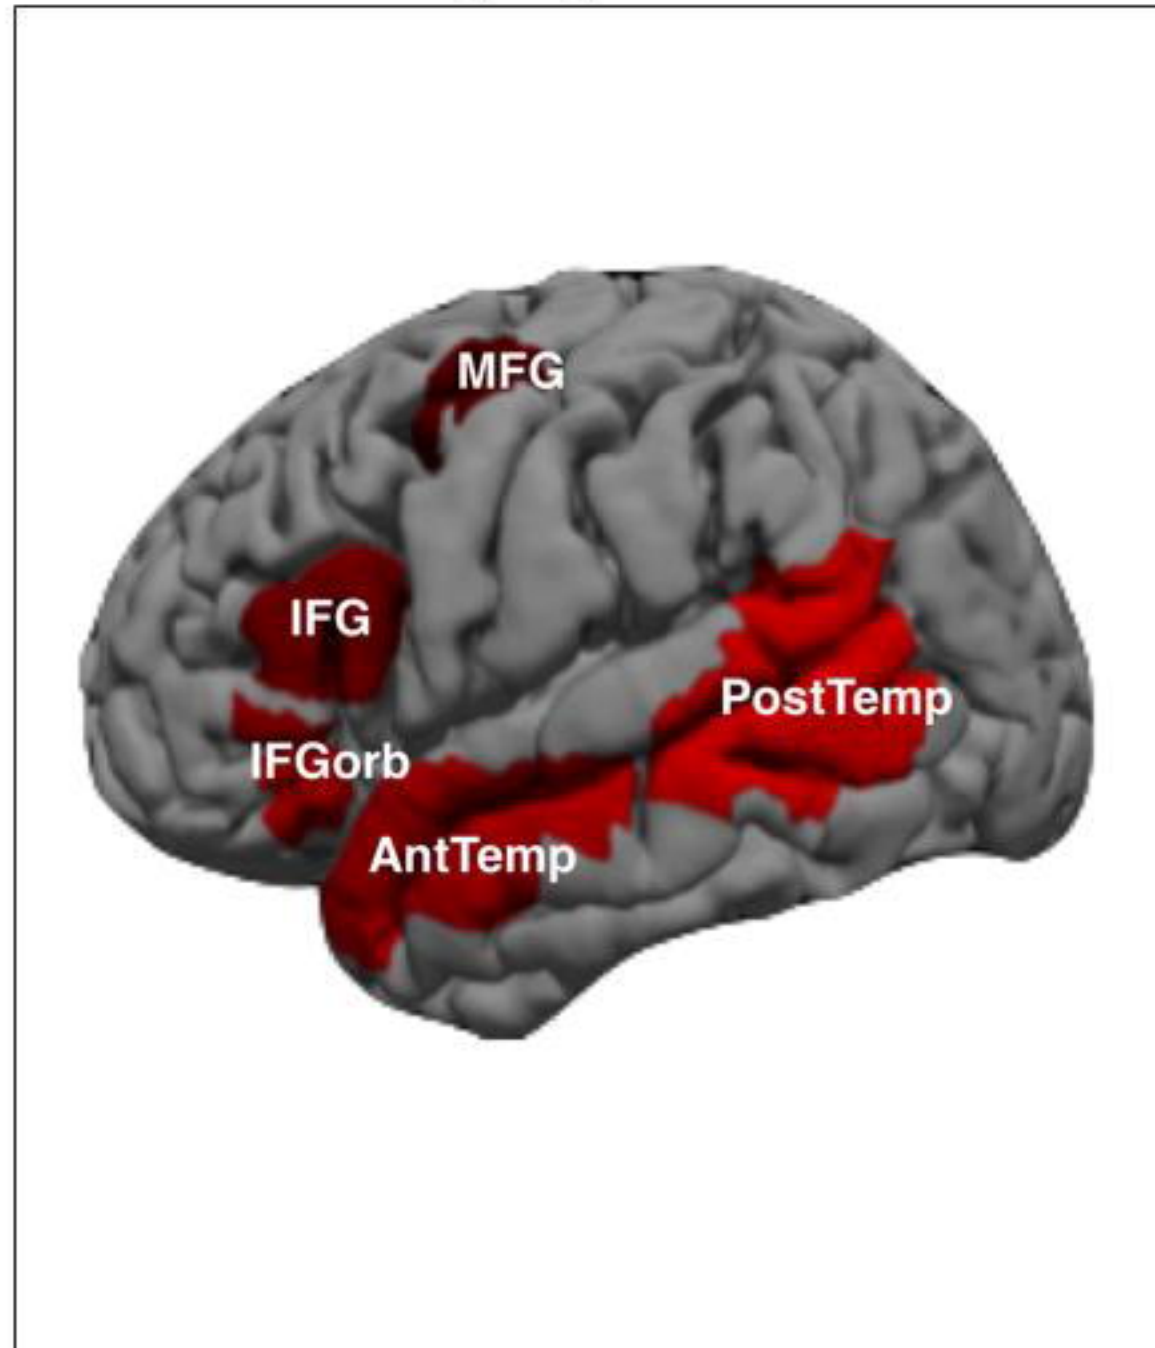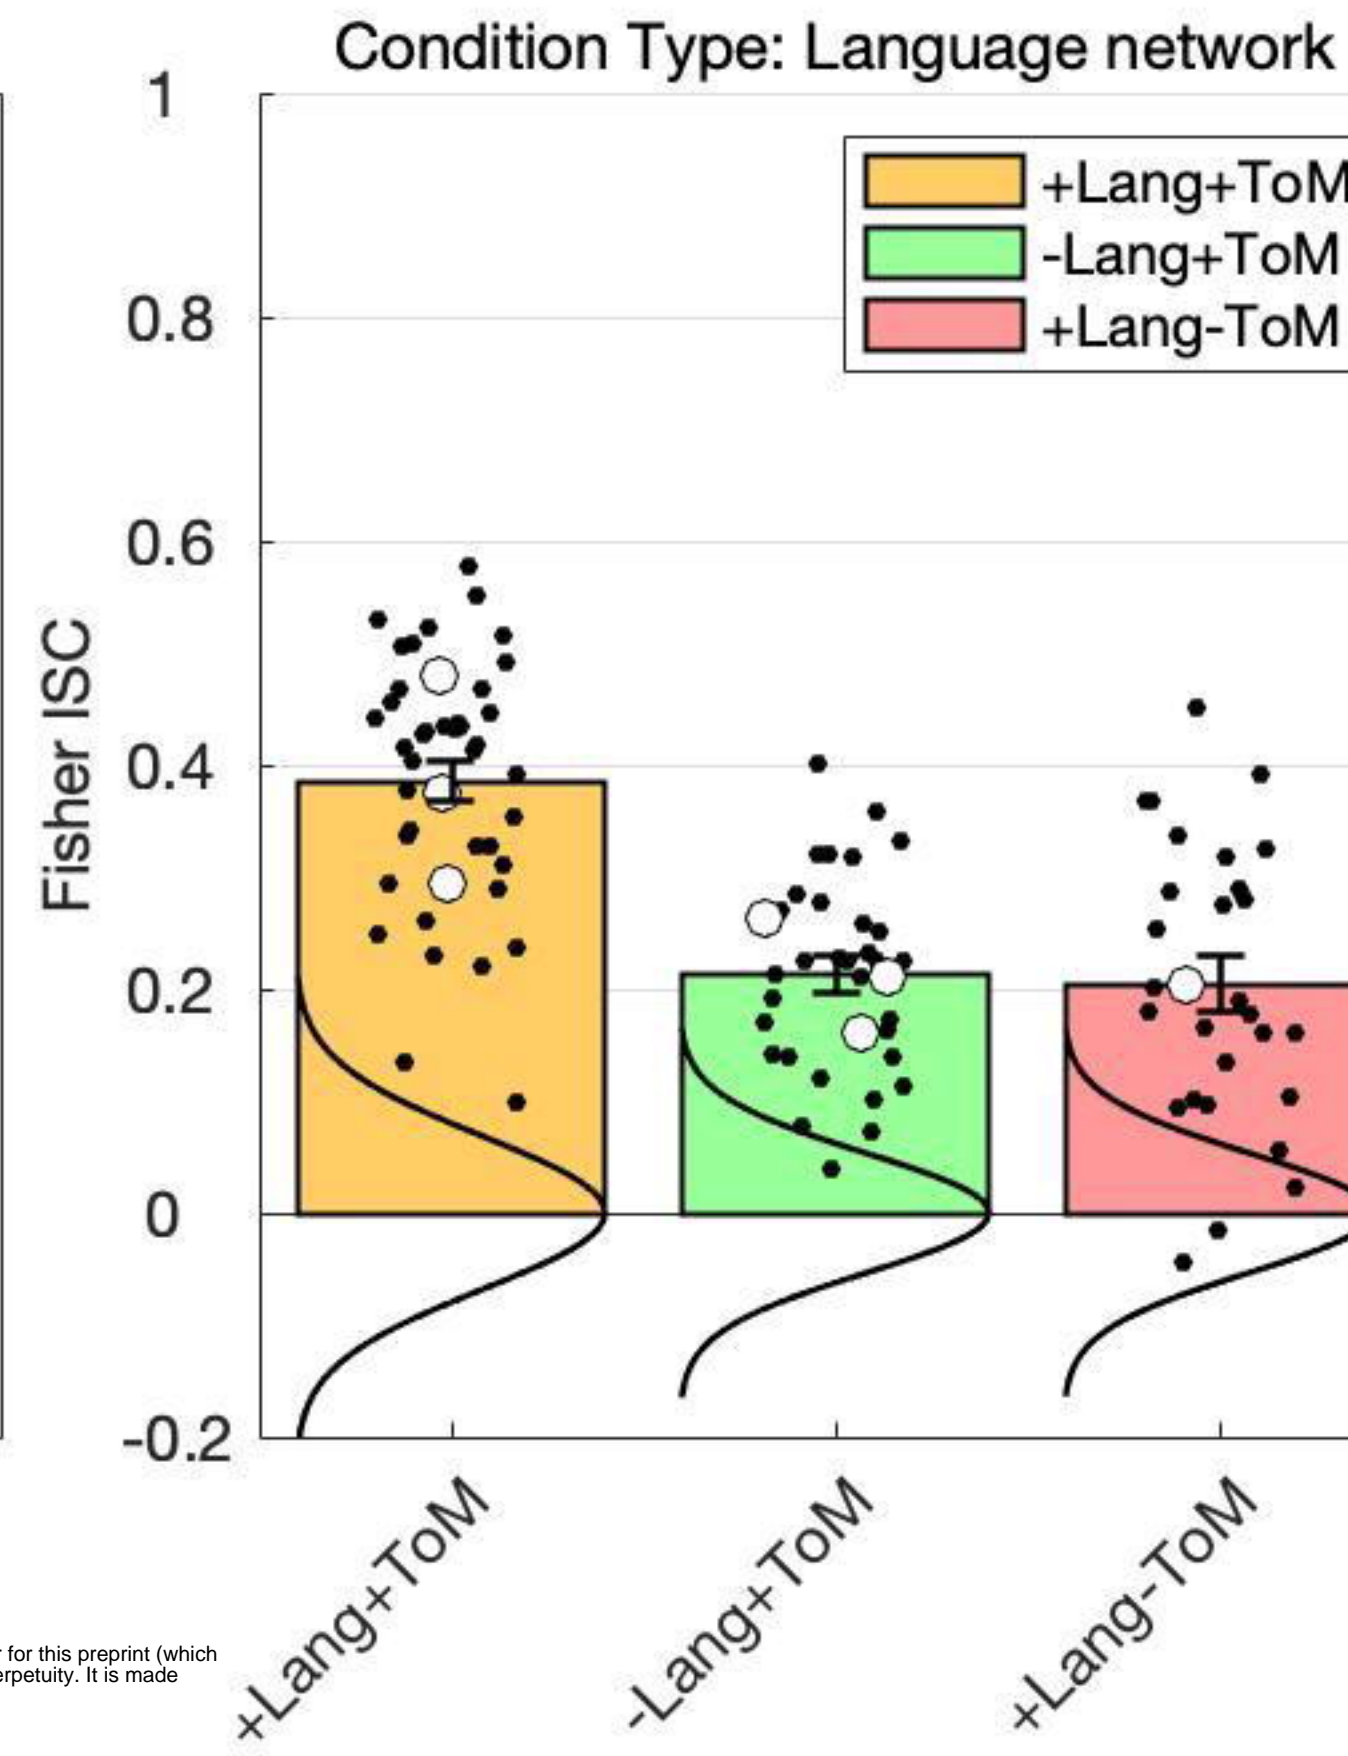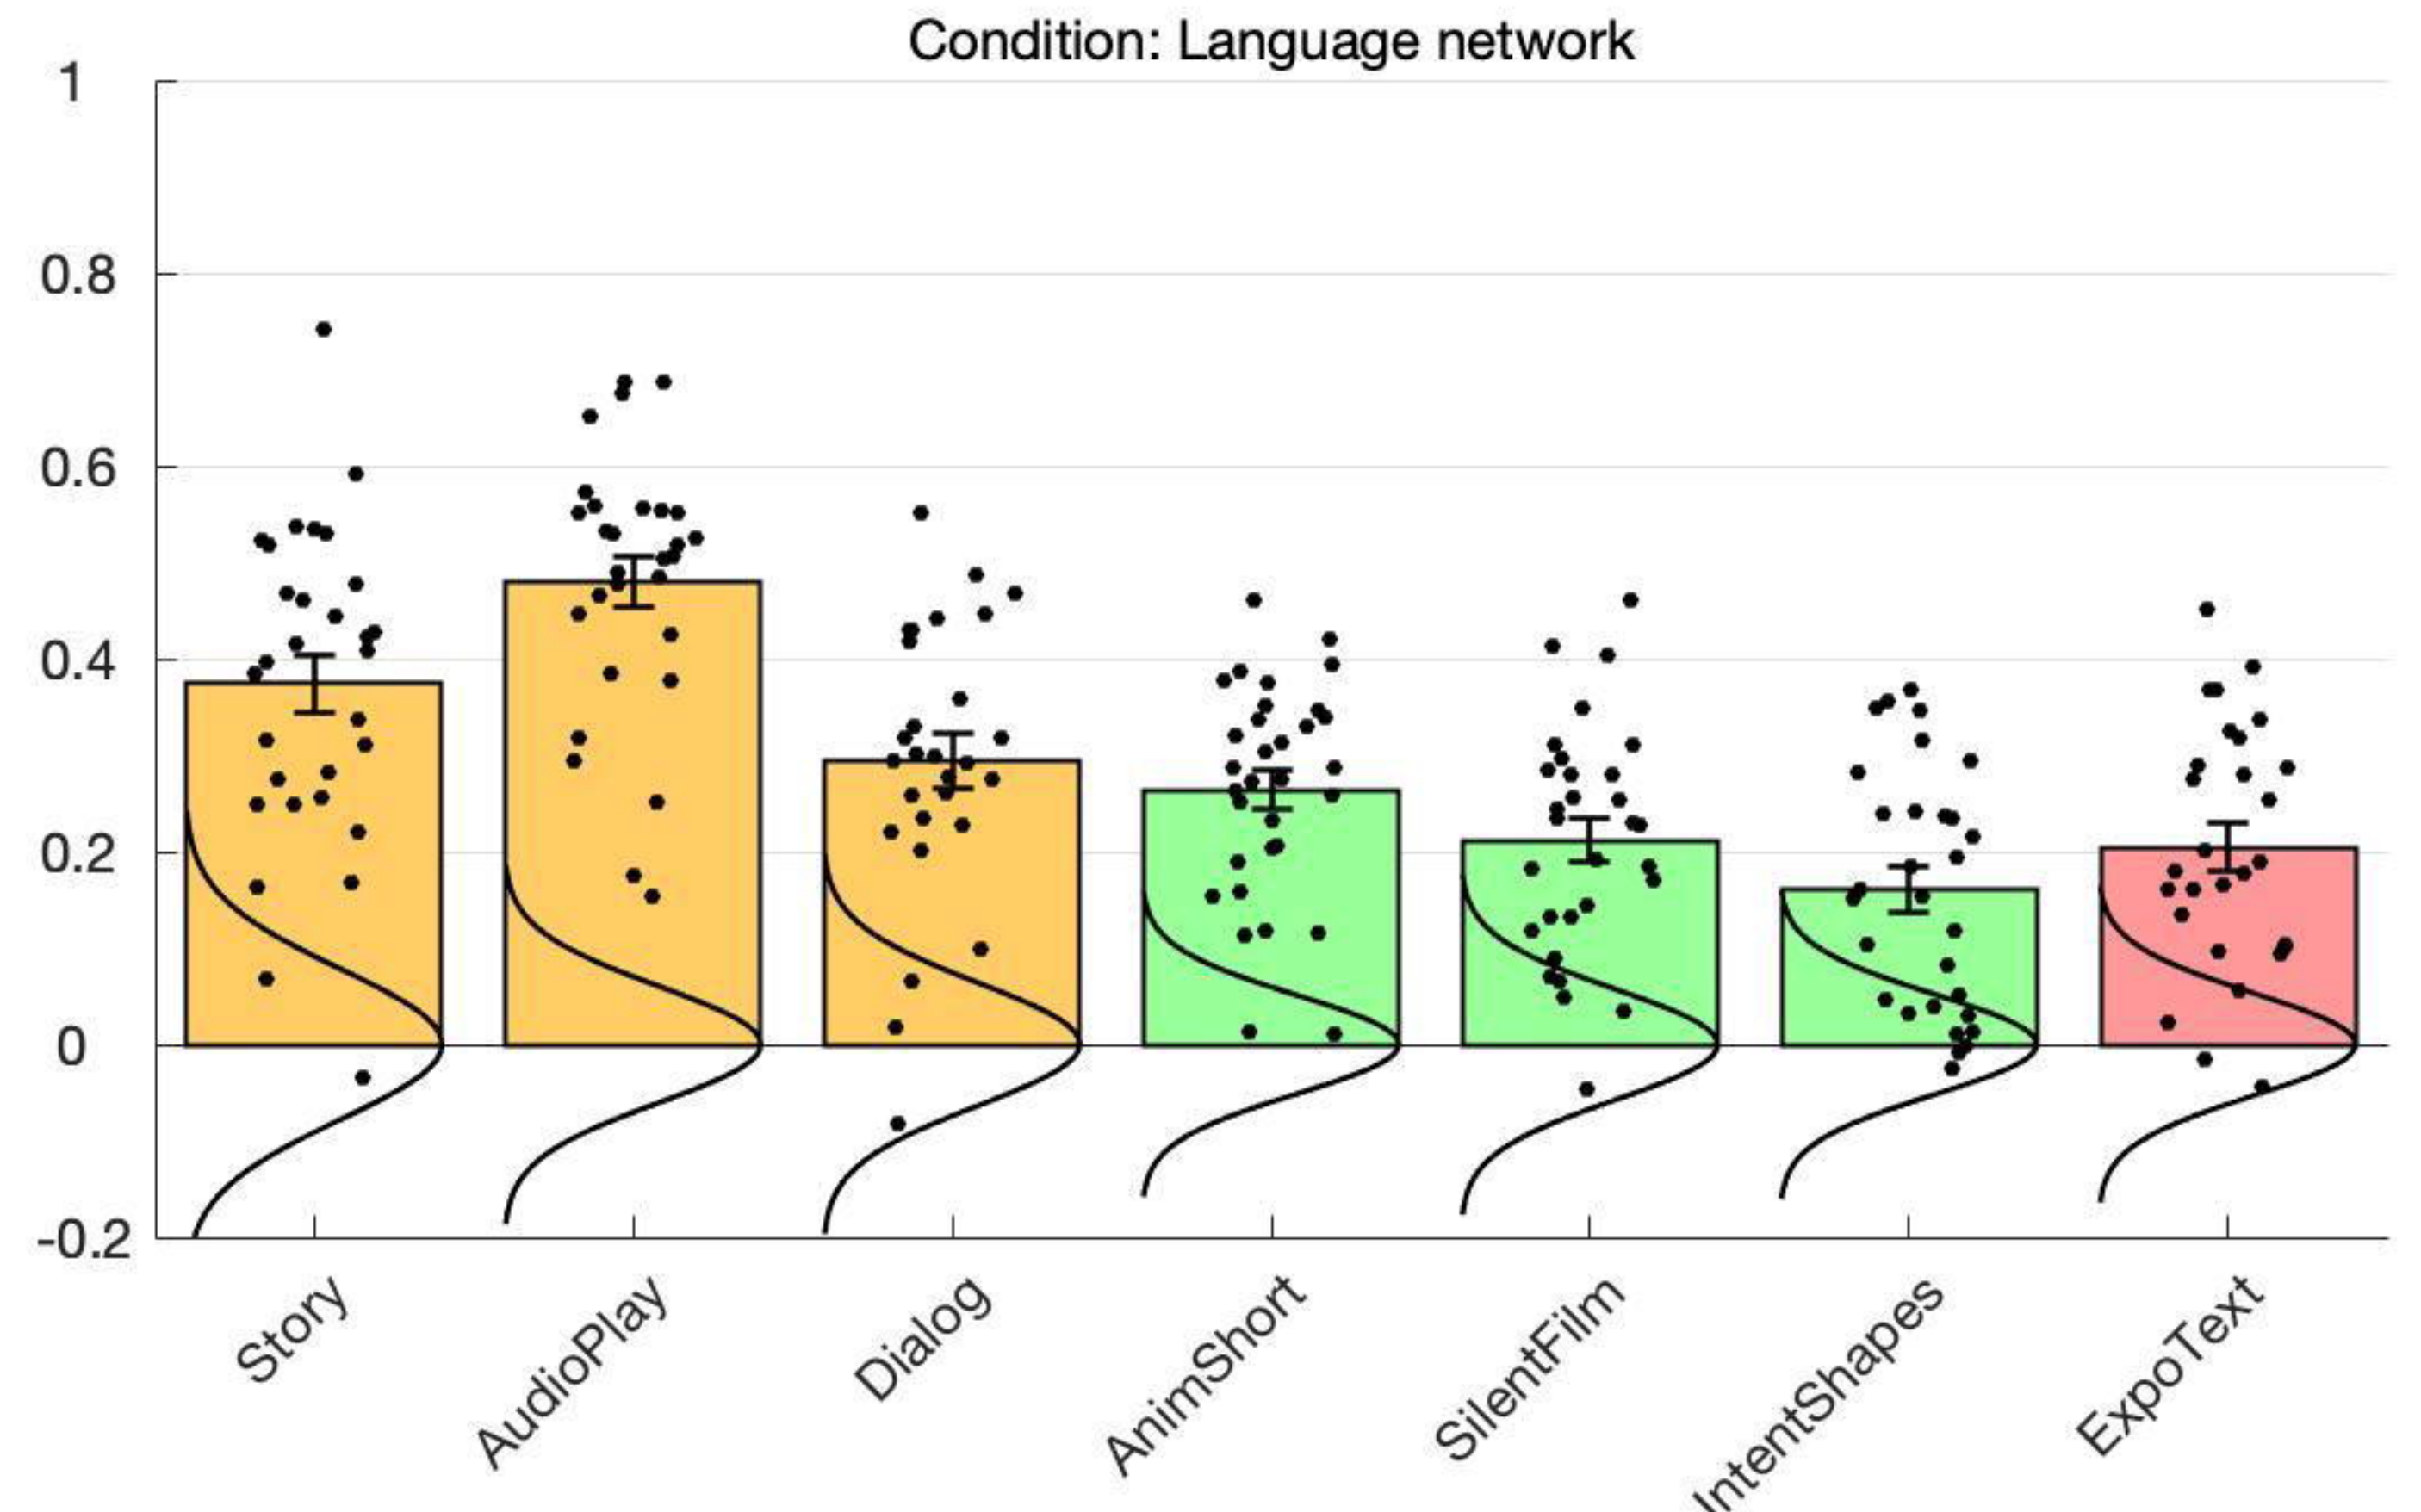

bioRxiv preprint doi: <https://doi.org/10.1101/2021.04.28.441724>; this version posted April 28, 2021. The copyright holder for this preprint (which was not certified by peer review) is the author/funder, who has granted bioRxiv a license to display the preprint in perpetuity. It is made available under aCC-BY-NC-ND 4.0 International license.

### ToM masks

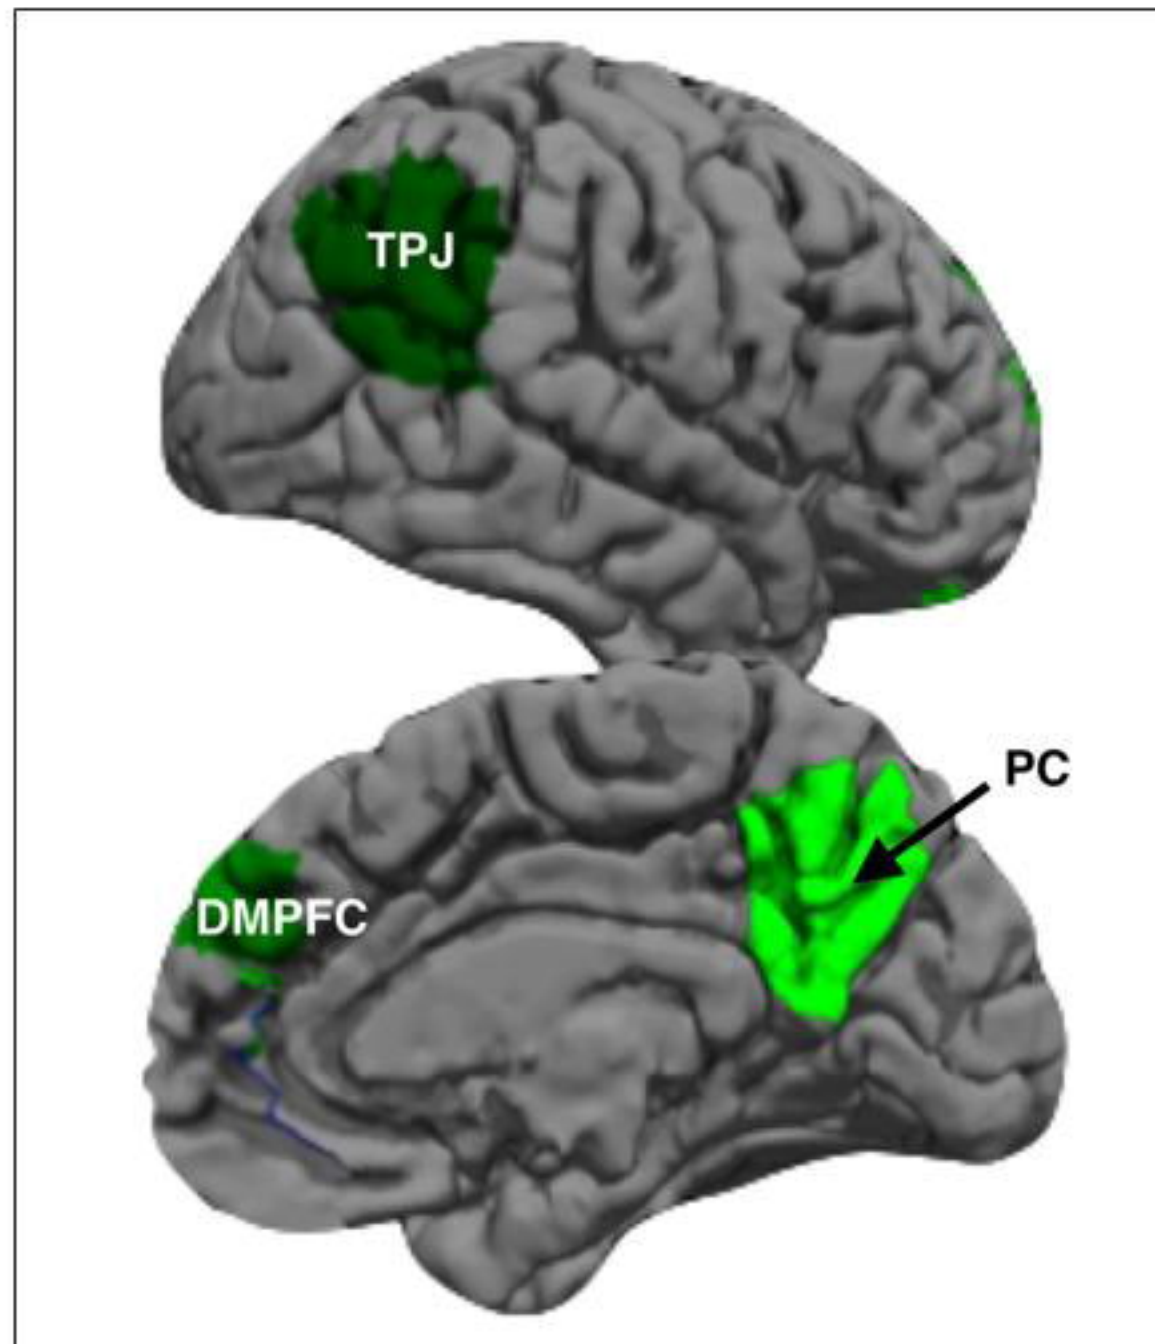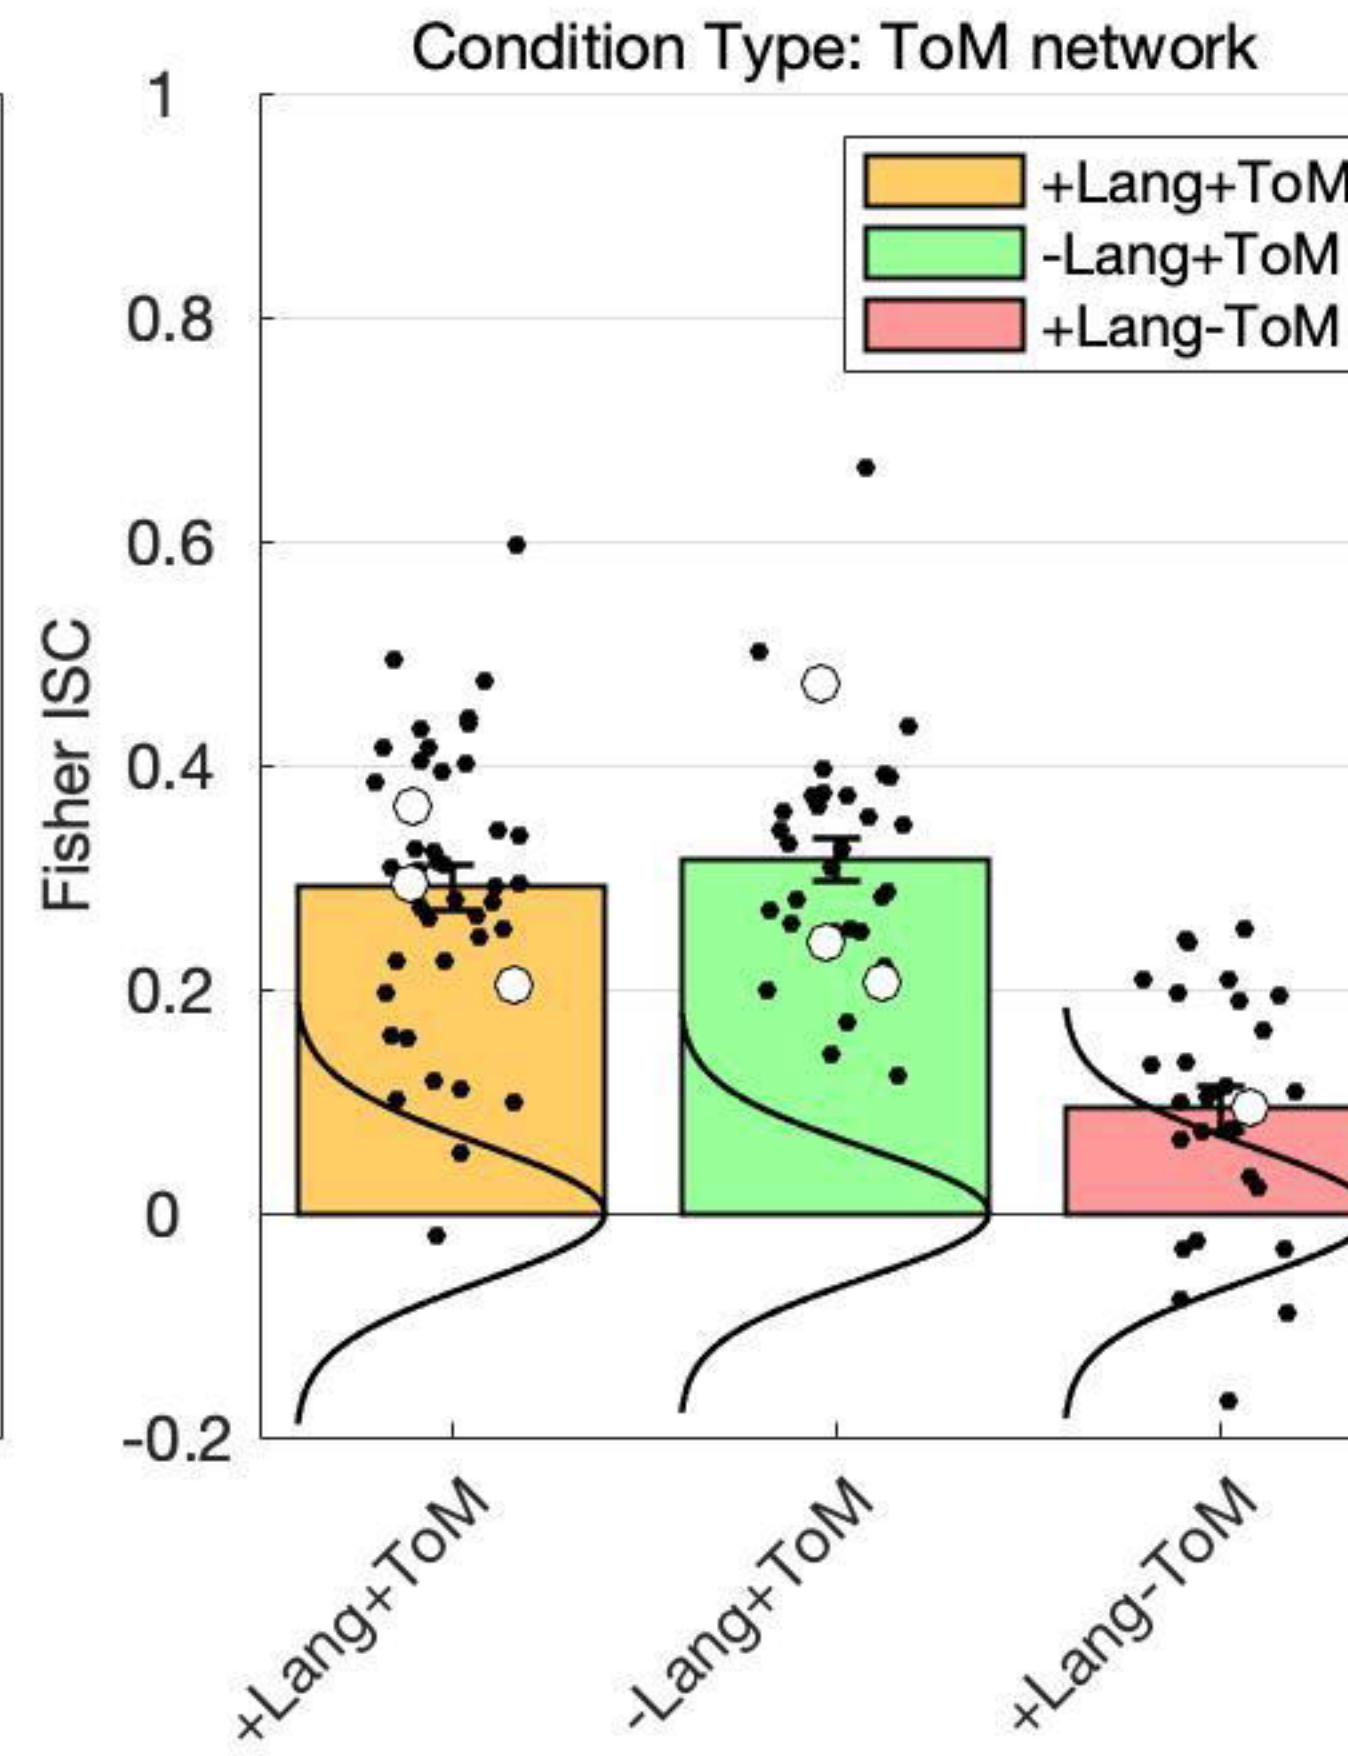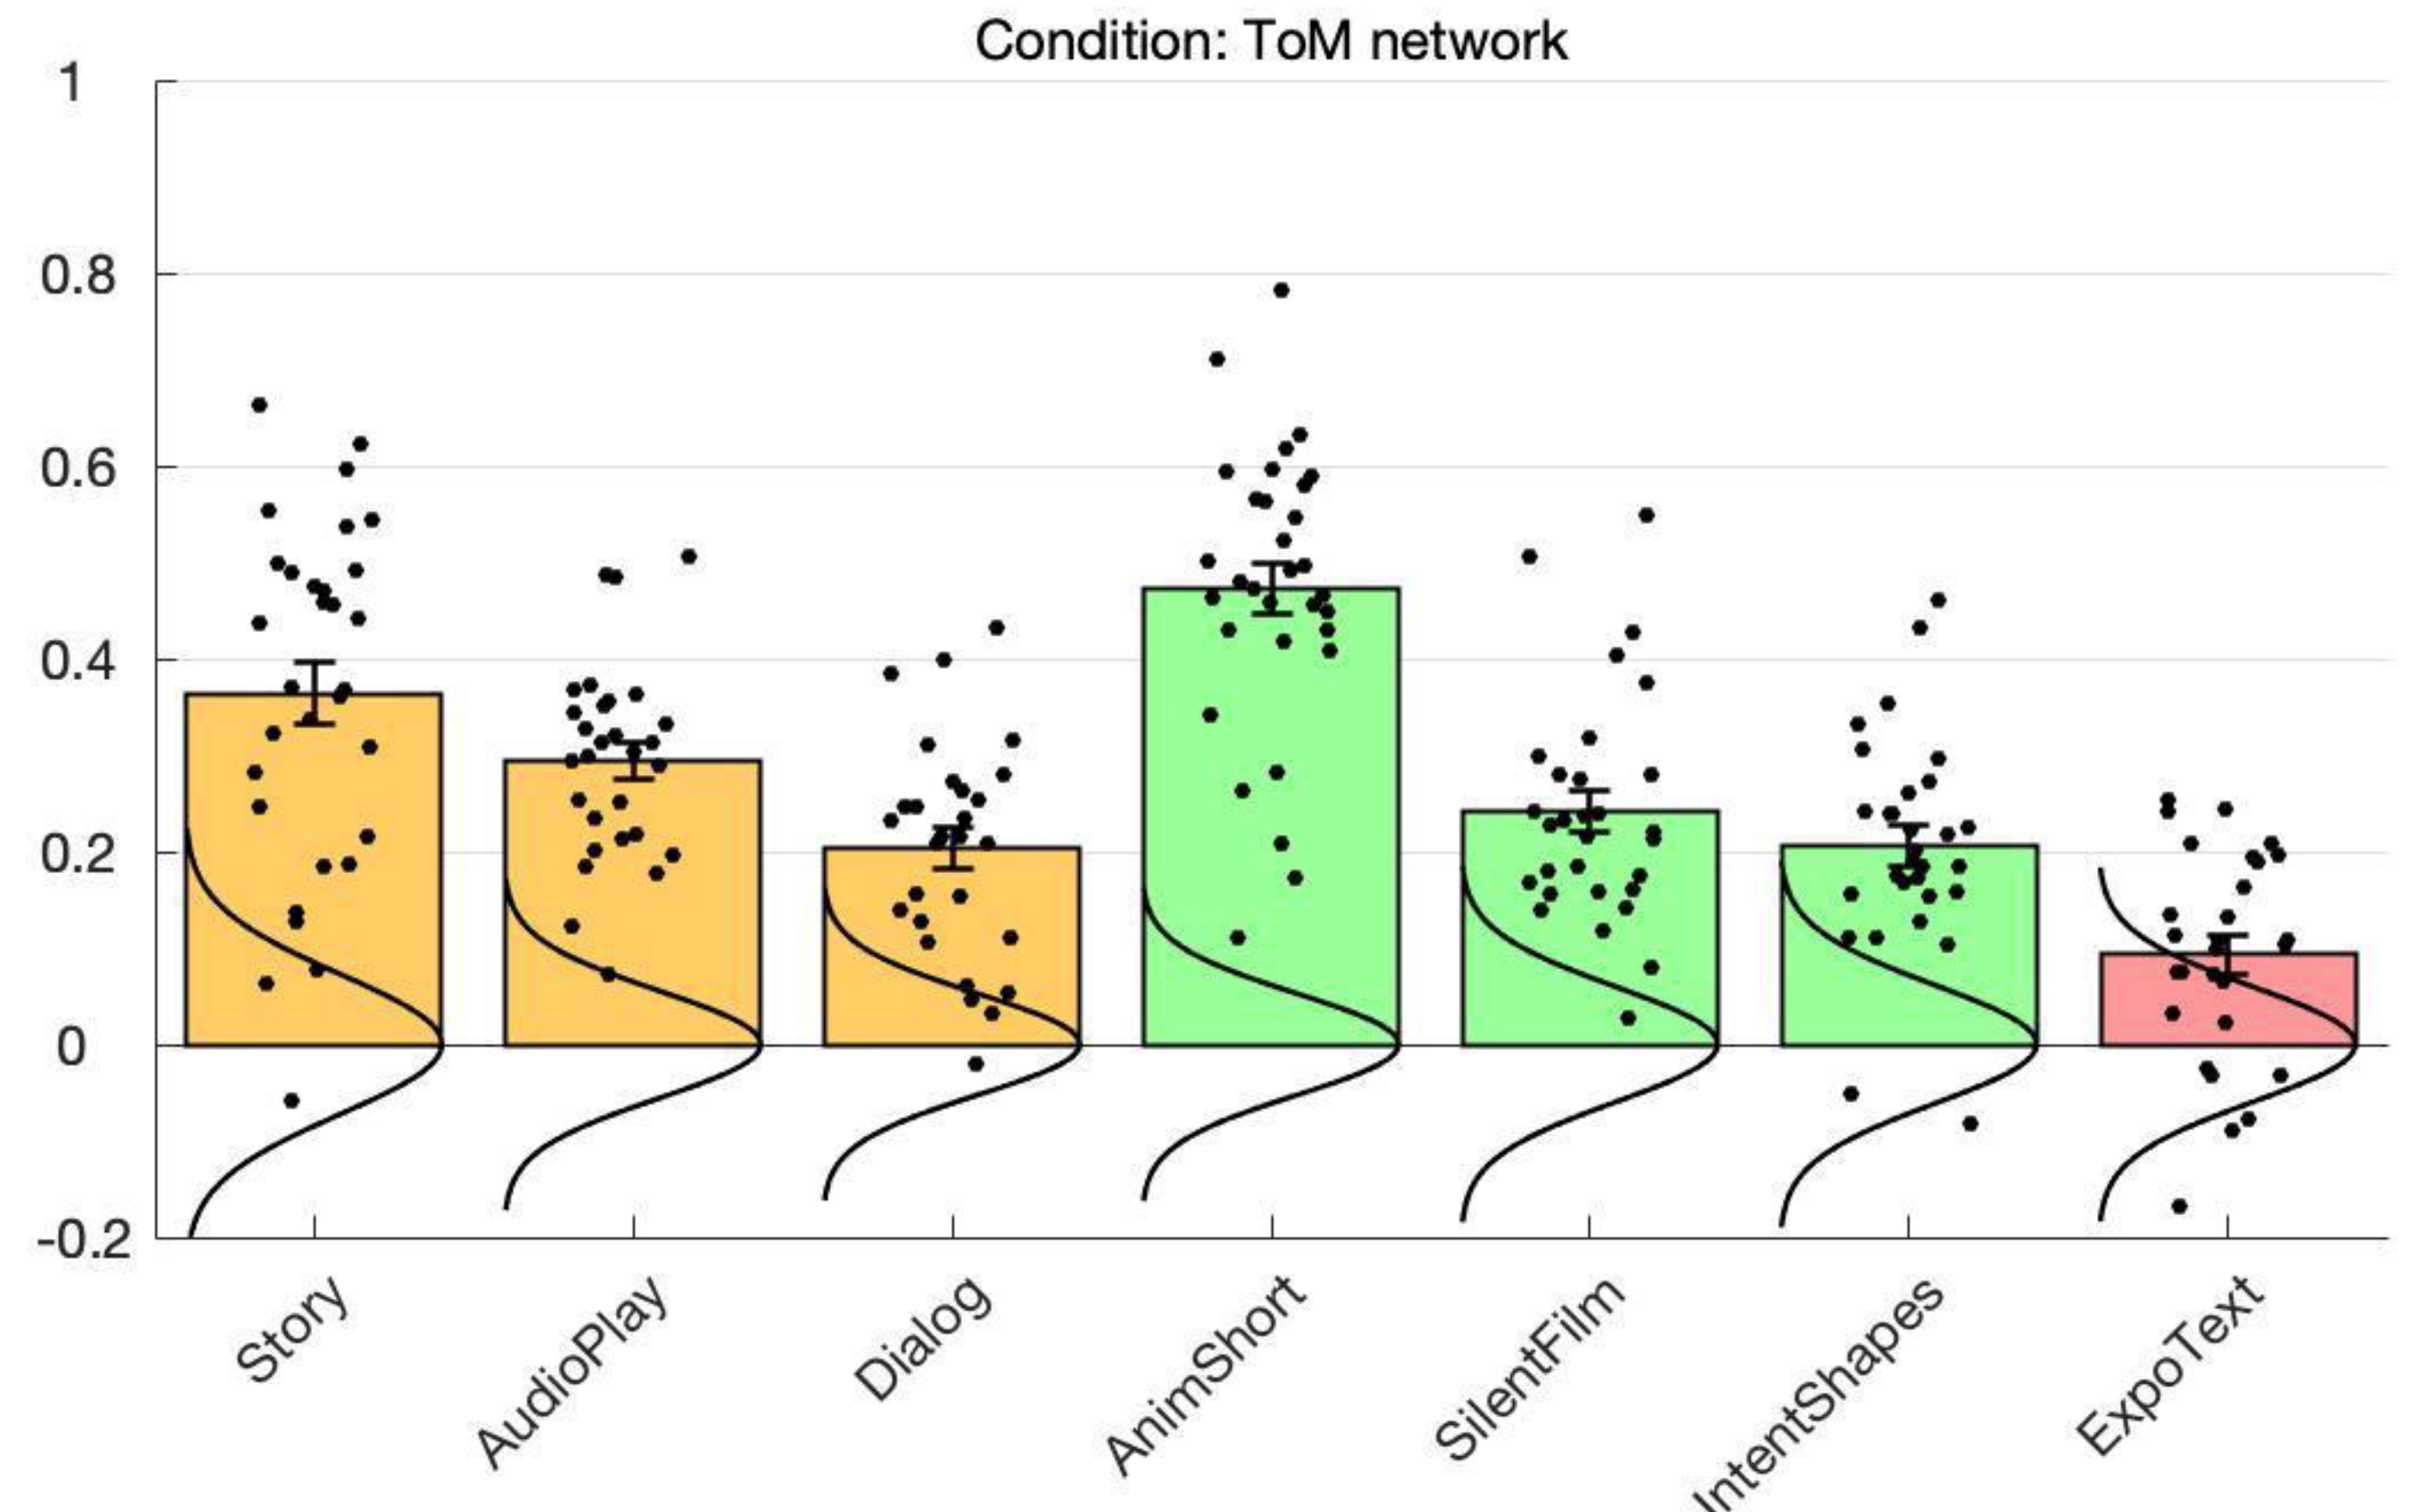

Source: http://biorxiv.org/content/10.1101/2021.04.28.441724v1.full.pdf
